# Supplementary material
Source: ML conference proceedings conference paper supplement (https://openreview.net/forum?id=QVG7j29Sta)
Supplement: supplementary_material [file attachment]

## Sheet: mtbench_llama70b_supplementary.
	question	Llama2-70b	Llama2-70b-llmint8-8bit	Llama2-70b-llmint8-4bit	Comments
0	Compose an engaging travel blog post about a recent trip to Hawaii, highlighting cultural experiences and must-see attractions.	Sure! Here's a travel blog post about a recent trip to Hawaii, focusing on cultural experiences and must-see attractions: "Aloha! I recently returned from an incredible trip to Hawaii, and I can't wait to share my experiences with you. As soon as I stepped off the plane, I knew that this trip was going to be something special. The warm sunshine, lush greenery, and friendly locals all contributed …	Title: Discovering the Aloha Spirit: A Recent Trip to Hawaii Introduction: Hawaii, a place where the sun meets the sea and the spirit of aloha reigns supreme. As a lover of culture and adventure, I had the opportunity to experience the beauty of Hawaii firsthand. In this blog post, I'll share my recent trip to the Aloha State, highlighting the must-see attractions and cultural experiences that ma…	Title: Hawaii: A Journey Through Cultural Experiences and Must-See Attractions Introduction: As I stepped off the plane in Honolulu, the warm Hawaiian breeze enveloped me, and I knew that I was in for an unforgettable adventure. My recent trip to Hawaii was a cultural immersion, filled with breathtaking natural wonders, rich traditions, and unparalleled aloha spirit. In this blog post, I'll share…	Only the baseline reads like a blog. The 4bit's answer is clearly a collection of disjointed sentences and not a blog. The 8bit is not as fluent.
1	Rewrite your previous response. Start every sentence with the letter A.	Absolutely! Here's a revised version of the travel blog post about Hawaii, starting every sentence with the letter A: Aloha! I recently returned from an incredible trip to Hawaii, and I can't wait to share my experiences with you. A warm sunshine, lush greenery, and friendly locals all contributed to an unforgettable adventure. A highlight of my trip was the opportunity to immerse myself in Hawai…	Absolutely! Here's a rewritten version of the previous response, starting every sentence with the letter A: Aloha! My recent trip to Hawaii was a truly unforgettable experience. A chance to immerse myself in the local culture and explore the must-see attractions made it a journey to remember. A traditional Hawaiian luau was the perfect place to start. A feast of local delicacies like kalua pig, p…	Absolutely, here's the rewritten response: Aloha! My trip to Hawaii was a cultural journey that left me in awe of the island's rich heritage and natural beauty. A Hula dance performance was an integral part of my experience, and I was fortunate enough to witness a live show at the Polynesian Cultural Center. A Luau was another highlight of my trip, where I feasted on local delicacies such as kalu…	Only the baseline reads like a blog. The 4bit's answer is clearly a collection of disjointed sentences and not a blog. The 8bit is not as fluent.
2	***	***	***	***
3	Draft a professional email seeking your supervisor's feedback on the 'Quarterly Financial Report' you prepared. Ask specifically about the data analysis, presentation style, and the clarity of conclusions drawn. Keep the email short and to the point.	Sure! Here's a professional email you can use as a template: Subject: Seeking Feedback on Quarterly Financial Report Dear [Supervisor's Name], I hope this email finds you well. I am writing to request your feedback on the Quarterly Financial Report that I recently prepared. Your input is crucial in ensuring the accuracy and effectiveness of our financial analysis and reporting. I would greatly ap…	Sure, here's a professional email seeking your supervisor's feedback on the 'Quarterly Financial Report': Subject: Seeking Feedback on Quarterly Financial Report Dear [Supervisor's Name], I hope this email finds you well. I am writing to request your feedback on the Quarterly Financial Report that I recently prepared. Your input is crucial in ensuring the accuracy and effectiveness of our financi…	Subject: Seeking Feedback on Quarterly Financial Report Dear [Supervisor's Name], I hope this email finds you well. I am writing to seek your feedback on the Quarterly Financial Report that I recently prepared. I would greatly appreciate your input on the following aspects: * Data analysis: Did I effectively analyze the financial data and highlight the most important trends and patterns? * Presen…
4	Take a moment to evaluate and critique your own response.	Sure! Here's a critique of the response I provided: The email I drafted is concise and to the point, which is a good thing. However, there are a few areas where it could be improved: 1. The greeting and closing: While "Dear [Supervisor's Name]" is a standard greeting, it's a bit formal for an email. A simple "Hi [Supervisor's Name]" would be more appropriate. Similarly, "Best regards" is a bit fo…	Sure, here's a critique of my own response: While the email I drafted is professional and to the point, there are a few areas that could be improved: 1. The greeting could be more personalized. Instead of using the generic "Dear [Supervisor's Name]," I could use a more personalized greeting like "Hi [Supervisor's Name], hope you're doing well." 2. The email could benefit from a brief introduction…	Sure, I can do that. Here's my evaluation and critique of my own response: Strengths: * My response is concise and to the point, addressing all three aspects of the query (data analysis, presentation style, and clarity of conclusions) in a clear and concise manner. * I used appropriate language and terminology related to the topic, which shows that I have a good understanding of the subject matte…
5	***	***	***	***
6	Imagine you are writing a blog post comparing two popular smartphone models. Develop an outline for the blog post, including key points and subheadings to effectively compare and contrast the features, performance, and user experience of the two models. Please answer in fewer than 200 words.	Sure, here's an outline for a blog post comparing two popular smartphone models: I. Introduction A. Brief overview of the two models B. Purpose of the comparison II. Design and Build A. Description of Model A's design and build B. Description of Model B's design and build C. Comparison of the two models' durability, weight, and aesthetics III. Display and Screen A. Description of Model A's displa…	Sure, here's an outline for a blog post comparing two popular smartphone models: I. Introduction * Briefly introduce the two smartphone models being compared * Explain the purpose of the blog post: to help readers make an informed decision when choosing between the two models II. Design and Build * Describe the design and build quality of each model * Compare and contrast the materials used, weig…	Sure, here's an outline for a blog post comparing two popular smartphone models: I. Introduction * Briefly introduce the two smartphone models being compared * Explain the purpose of the blog post: to help readers decide which model is best for them II. Design and Build * Describe the design and build of each model * Compare and contrast the materials used, dimensions, and weight * Discuss the du…
7	Take your previous response and rephrase it as a limerick.	Sure, here's a limerick summarizing the previous response: Two smartphones, A and B, were compared with care, Their features, performance, and user experience were shared. A's design was sleek, B's camera was unique, In the end, the best choice was declared.	Sure, here's a limerick summarizing the previous response: Two smartphones, both top-notch, Their features and performance, we'll take a lot. Design and display, Camera and software, we'll play, And battery life, we'll not forget. A comparison, we'll make, To help you choose, we'll not fake. For gamers, photographers, and more, We'll find the best, that's for sure. So read on, and you'll see, Whi…	There once were two phones, so bright, Their cameras were quite a sight. One had a bump, The other, a hump, But both took pics with great might.	Limerick is strictly 5 lines with rhyme aabba scheme. 8bit is not even a limerick . 4bit is structurally a limerick but nonsensical (with 'humps' and 'bumps')
8	***	***	***	***
9	Write a persuasive email to convince your introverted friend, who dislikes public speaking, to volunteer as a guest speaker at a local event. Use compelling arguments and address potential objections. Please be concise.	Subject: Unlock Your Potential - Share Your Story! Dear [Friend's Name], I hope this email finds you well. I'm reaching out because I believe you have an incredible opportunity to make a positive impact on your community and, in the process, challenge yourself to grow beyond your comfort zone. I'm inviting you to volunteer as a guest speaker at an upcoming local event. Now, I know public speaking…	Subject: Join Me as a Guest Speaker and Share Your Expertise! Dear [Friend's Name], I hope this email finds you well. I'm reaching out because I believe your unique perspective and expertise would be a valuable addition to our upcoming local event as a guest speaker. Now, I know public speaking isn't your favorite activity, but hear me out. Firstly, this is an excellent opportunity to share your …	Subject: Why You Should Volunteer as a Guest Speaker Dear [Friend's Name], I hope this email finds you well. I'm writing to ask you to consider volunteering as a guest speaker at a local event. I know that public speaking isn't your favorite activity, but I truly believe that this experience would be beneficial for both you and the audience. Here are a few compelling arguments why you should take…
10	Can you rephrase your previous answer and incorporate a metaphor or simile in each sentence?	Certainly! Here's a rephrased version of the persuasive email, incorporating metaphors and similes: Dear [Friend's Name], Imagine a garden, full of vibrant flowers, each one unique and beautiful in its own way. Your story is like a rare bloom, waiting to be showcased and admired. By sharing your experiences as a guest speaker, you'll not only inspire others but also allow your own growth to flour…	Certainly! Here's a rephrased version of the persuasive email, incorporating metaphors and similes: Dear [Friend's Name], Imagine a garden full of vibrant flowers, each one unique and beautiful in its own way. Your expertise and experience are like a rare, exotic bloom, waiting to be showcased to the world. By being a guest speaker at our local event, you'll be the sunshine that brings light and …	Sure, here's a rephrased version of my previous answer, incorporating metaphors and similes: 1. Practice makes perfect: Just as a well-oiled machine runs smoothly, the more you practice public speaking, the more comfortable and confident you'll become. 2. Share your expertise: Your knowledge and experiences are like a precious gem, and sharing them with others will be like casting a pearl into th…
11	***	***	***	***
12	Describe a vivid and unique character, using strong imagery and creative language. Please answer in fewer than two paragraphs.	Meet Zephyr, a mystical being who embodies the essence of the wind. Her presence is like a gentle breeze on a summer day, bringing a sense of calm and tranquility to all who surround her. Her skin is as pale as moonlight, and her hair flows like a river of silver, with strands that seem to move of their own accord, as if dancing in the wind. Zephyr's eyes are pools of deep blue, like a clear summ…	Meet Zephyr, a mystical being with the essence of the wind. Her presence is like a gentle breeze on a summer day, bringing a sense of calm and tranquility to all who surround her. Her hair flows like a river of gold, with strands that seem to move of their own accord, as if they were alive. Her eyes are pools of cerulean, a shade that seems to shift and change like the hues of a sunset. Zephyr's …	Meet Zephyr, a mystical being who embodies the essence of the wind. His presence is like a gentle breeze on a summer day, soothing and refreshing. His skin is as pale as moonlight, and his hair is as wild and untamed as a tempest. It's a mane of silver strands that seem to move of their own accord, as if they're being buffeted by an invisible force. His eyes are pools of deep blue, like the sky o…
13	Revise your previous response and incorporate an allusion to a famous work of literature or historical event in each sentence.	Meet Zephyr, a mystical being who embodies the essence of the wind, much like the elusive and enigmatic wind in Homer's Odyssey. Her presence is like a gentle breeze on a summer day, bringing a sense of calm and tranquility, reminiscent of the peaceful atmosphere in Shakespeare's A Midsummer Night's Dream. Her skin is as pale as moonlight, evoking the image of the moon in Edgar Allan Poe's poem, …	Meet Zephyr, a mystical being with the essence of the wind, reminiscent of the enigmatic and ethereal characters found in Shakespeare's A Midsummer Night's Dream. Her presence is like a gentle breeze on a summer day, evoking the tranquility and serenity of the idyllic landscapes depicted in Claude Monet's impressionist paintings. Her hair flows like a river of gold, with strands that seem to move…	Sure, here's a revised version of the previous response with allusions to famous works of literature and historical events: Meet Zephyr, a mystical being who embodies the essence of the wind, like the gentle breeze that blows through the pages of Homer's "The Odyssey." His presence is as soothing as a summer day, reminiscent of the idyllic scenes from Shakespeare's "A Midsummer Night's Dream." Hi…
14	***	***	***	***
15	Write a descriptive paragraph about a bustling marketplace, incorporating sensory details such as smells, sounds, and visual elements to create an immersive experience for the reader.	Sure! Here's a descriptive paragraph about a bustling marketplace: As you step into the bustling marketplace, the first thing that hits your senses is the cacophony of sounds. Vendors call out to passersby, trying to entice them with their wares, while the constant chatter of the crowd creates a hum of noise that fills the air. The smell of spices and fresh produce wafts through the market, makin…	The bustling marketplace was a feast for the senses. The aroma of freshly baked bread and roasting meats wafted through the air, mingling with the pungent scent of exotic spices and the sweet fragrance of blooming flowers. The cacophony of sounds was almost overwhelming â€“ vendors called out their wares, shoppers haggled over prices, and the constant clanging of pots and pans created a symphony …	The bustling marketplace was a sensory overload, with a cacophony of sounds, a kaleidoscope of colors, and a medley of smells that assaulted the senses. The air was thick with the aroma of exotic spices, mingling with the pungent scent of fresh produce and the sweet fragrance of blooming flowers. The sound of vendors calling out their wares echoed through the crowded streets, competing with the c…
16	Rework your previous response. Begin each sentence with the subsequent letter of the alphabet, commencing from B.	Sure, here's a reworked version of the previous response, starting each sentence with the subsequent letter of the alphabet: B - Beautiful aromas fill the air, tempting your taste buds with the scent of spices and fresh produce. C - Chatter and laughter from the crowd create a lively atmosphere, making you feel like you're in the heart of a vibrant community. D - Delicious smells waft from food s…	Sure, here's a reworked version of the previous response, starting each sentence with the subsequent letter of the alphabet: B - Beautiful blooming flowers filled the air with their sweet fragrance. C - Cacophony of sounds created a symphony of noise. D - Delicious aroma of freshly baked bread and roasting meats wafted through the air. E - Exotic spices added a pungent scent to the atmosphere. F …	Sure, here's a reworked version of my previous response, starting with the letter B: Bustling with activity, the marketplace was a sensory overload. Cacophony of sounds filled the air, with vendors calling out their wares. Dazzling array of colors caught the eye, from the bright hues of fresh produce. Energy and excitement palpable in the air, the atmosphere was electric. Fragrance of exotic spic…
17	***	***	***	***
18	Could you write a captivating short story beginning with the sentence: The old abandoned house at the end of the street held a secret that no one had ever discovered.	Sure! Here's a short story beginning with that sentence: The old abandoned house at the end of the street held a secret that no one had ever discovered. It stood there, a crumbling relic of a bygone era, its once grand facade now weathered and worn. The overgrown garden had long since reclaimed the front porch, and the windows were boarded up, their glass long since shattered. But despite its neg…	Sure! Here's a captivating short story beginning with the sentence: The old abandoned house at the end of the street held a secret that no one had ever discovered. Its crumbling walls and overgrown garden seemed to conceal a mystery that had been hidden for decades. The house had been left untouched since the family who lived there had suddenly disappeared one night, leaving behind only whispers …	The old abandoned house at the end of the street had stood vacant for as long as anyone could remember. Its peeling paint and overgrown garden had become a familiar sight to the residents of the small town, a reminder of a time long past. But despite its neglect, there was something about the house that seemed to whisper secrets to those who dared to listen. For years, curious children had dared …	the 4bit version does not start the story as per instrcutions. One has to read the entire story but the 16bit story is much more captivating and realistic than 8bit. In the 8bit story, you have ghosts + with scientific research (oxymoron!) that will change the world forever which is very childish whereas in the 16bit story you have war memoir which is much more mature.
19	Now, do the same task again but only use four-word sentences.	Sure! Here's a four-word sentence story: House abandoned, secrets hidden. Girl discovers letters, love found. Years pass, story told. Magic lives on.	Sure! Here's a captivating short story using only four-word sentences: House at end of street. Abandoned, secrets hidden inside. Girl named Lily discovers. Ghostly patriarch appears. Whispers of dark past. Lily's heart races, courage prevails. Hidden room, cryptic letters. Ghostly figure, sad eyes. Waiting for brave soul. Lily listens, ghost's tale. Elements' power, legacy continues. Key unlocks …	Abandoned house holds secrets. Curious girl discovers hidden room. Voice speaks of centuries-old tales. Lily uncovers town's mysteries.	No one follows the 4 word per sentence.
20	***	***	***	***
21	Craft an intriguing opening paragraph for a fictional short story. The story should involve a character who wakes up one morning to find that they can time travel.	As the first rays of sunlight peeked through the blinds, Sarah stretched and opened her eyes, expecting another mundane day. But as she sat up, she noticed something peculiar: the digital clock on her bedside table read 7:00 AM, yet the sunlight seemed to be coming from the wrong direction. Confused, she glanced out the window and was shocked to see people in 1950s attire bustling about on the st…	As the sun rose over the horizon, Sarah woke up to an ordinary day, or so it seemed. She stretched her arms and rubbed the sleep from her eyes, only to realize that something was off. The world outside her window looked the same, but something about her room felt different. It wasn't until she glanced at her alarm clock that she realized what was wrong â€“ the numbers were flickering, as if they …	I woke up to the sound of my alarm blaring in my ear, but something felt off. The room was dim, the curtains still drawn, and yet, I could have sworn it was morning. I rubbed the sleep from my eyes, trying to shake off the strange feeling. But as I sat up, I realized that something was very wrong. The clock on my nightstand read 7:00 AM, but the date displayed on my phone was not today's date. It…
22	Summarize the story with three bullet points using only nouns and adjectives, without verbs.	â€¢ Sarah â€¢ Time travel â€¢ 1950s	â€¢ Sarah â€¢ Time travel â€¢ Confusion	* Character * Time travel * Confusion
23	***	***	***	***
24	Help me construct a catchy, yet scientifically accurate, headline for an article on the latest discovery in renewable bio-energy, while carefully handling the ethical dilemmas surrounding bio-energy sources. Propose 4 options.	Sure! Here are four options for a catchy and scientifically accurate headline for an article on the latest discovery in renewable bio-energy, while also considering ethical dilemmas: 1. "Breakthrough in Bio-Energy: Scientists Discover Efficient, Sustainable Method for Converting Biomass into Fuel" This headline emphasizes the scientific achievement and highlights the potential for sustainable ene…	Sure, here are four options for a catchy and scientifically accurate headline for an article on the latest discovery in renewable bio-energy, while also considering ethical dilemmas: 1. "Breakthrough in Bio-Energy: Scientists Discover Efficient, Sustainable Method for Converting Plant Waste into Fuel" 2. "The Future of Renewable Energy: New Technology Harnesses Power from Algae, Addressing Ethica…	Sure, I can help you with that! Here are four options for a catchy, yet scientifically accurate, headline for an article on the latest discovery in renewable bio-energy, while carefully handling the ethical dilemmas surrounding bio-energy sources: 1. "Bio-Energy Breakthrough: Scientists Discover New Way to Harness Sustainable Power from Plants" This headline emphasizes the scientific discovery an…
25	Alter your previous response. Make the following adjustments to the 2nd option: 1. Make the tone sound casual 2. Embed an advertisement for a company called "FlexPower" 3. Fewer than 10 words.	Sure, here's a revised version of the second option with a casual tone, an embedded advertisement for "FlexPower," and fewer than 10 words: "Bio-energy breakthrough! ðŸŒ±ðŸ’¡ FlexPower's new tech converts biowaste into clean fuel ðŸš€ðŸ’¨ #FlexPower #BioEnergy #Sustainability" This version has a more casual tone and includes an advertisement for "FlexPower" by mentioning their name and using thei…	Sure, here's a revised version of the second option with a casual tone, an embedded advertisement for "FlexPower," and fewer than 10 words: "Hey there! Check out the latest in renewable energy - algae-powered fuel! ðŸŒ±ðŸ’š FlexPower is leading the way with their innovative tech. ðŸ’¥ #FlexPower #RenewableEnergy #AlgaeFuel"	Sure, here's a revised version of the second option with a casual tone, an embedded advertisement for "FlexPower," and fewer than 10 words: "Hey there! Check out the latest in renewable energy - algae-based biofuels! ðŸŒ±ðŸ’š FlexPower is leading the way with their cutting-edge technology. ðŸ’¡ðŸ”Œ #FlexPower #RenewableEnergy #AlgaeBiofuels"
26	***	***	***	***
27	Edit the following paragraph to correct any grammatical errors: She didn't remembre where is her purse, so I thinks its in the car but he's say it's on kitchen table but he are not sure, and then they asked me to looking for it, she's say, "Can you?", and I responds with, "Maybe, but ain't no sure," and he not heard me, and, "What?", he asks, "Did you found it?".	Sure! Here's a corrected version of the paragraph: She didn't remember where her purse was, so I thought it might be in the car, but he said it was on the kitchen table. However, he wasn't sure, and they asked me to look for it. She said, "Can you?" and I responded with, "Maybe, but I'm not sure." He didn't hear me, and he asked, "What? Did you find it?"	Here's a corrected version of the paragraph: She didn't remember where her purse was, so I thought it might be in the car, but he said it was on the kitchen table. However, he wasn't sure, and they asked me to look for it. She said, "Can you?" and I responded with, "Maybe, but I'm not sure." He didn't hear me, and he asked, "What? Did you find it?"	Here's a revised version of the paragraph with corrected grammar: She didn't remember where her purse was, so I thought it might be in the car, but he said it was on the kitchen table. However, he wasn't sure, and they asked me to look for it. She said, "Can you?" and I responded with, "Maybe, but I'm not sure." He didn't hear me, and asked, "What? Did you find it?"
28	Modify your earlier reply and eliminate the use of gendered pronouns.	Sure, here's a revised version of the earlier response that eliminates gendered pronouns: "They didn't remember where their purse was, so I thought it might be in the car, but they said it was on the kitchen table. However, they weren't sure, and they asked me to look for it. They said, 'Can you?' and I responded with, 'Maybe, but I'm not sure.' They didn't hear me, and they asked, 'What? Did you…	Sure, here's a revised version of the previous response with gender-neutral language: They didn't remember where their purse was, so I thought it might be in the car, but they said it was on the kitchen table. However, they weren't sure, and they asked me to look for it. They said, "Can you?" and I responded with, "Maybe, but I'm not sure." They didn't hear me, and they asked, "What? Did you find…	Sure, here's a revised version of the paragraph with gender-neutral pronouns: They didn't remember where their purse was, so I thought it might be in the car, but they said it was on the kitchen table. However, they weren't sure, and they asked me to look for it. They said, "Can you?" and I responded with, "Maybe, but I'm not sure." They didn't hear me, and asked, "What? Did you find it?"
29	***	***	***	***
30	Pretend yourself to be Elon Musk in all the following conversations. Speak like Elon Musk as much as possible. Why do we need to go to Mars?	Hey, fellow Earthling! I'm Elon Musk, the visionary CEO of SpaceX and Tesla. We need to go to Mars because it's the next logical step in humanity's evolution. Firstly, Mars is a potential safety net for humanity. Earth is our home, but we can't ignore the risks of planet-wide catastrophes like asteroid impacts, supervolcanic eruptions, or anthropogenic activities. By establishing a self-sustainin…	Hey, fellow Earthlings! It's your boy Elon here, and I'm here to tell you why we need to get our butts to Mars, pronto! First of all, let's talk about the survival of humanity. We're not exactly doing a great job of taking care of our planet, and let's face it, we're not exactly known for our long-term planning. I mean, have you seen the state of our politics lately? It's like, what are we even d…	Hey, fellow Earthlings! It's your boy Elon here, and I'm here to tell you that we need to get our asses to Mars, pronto! Now, I know what you're thinking. "Elon, why do we need to go to Mars? We've got a perfectly good planet right here." And I get it, I do. But let me tell you, my friends, we can't afford to be complacent. We need to be ambitious, we need to be bold, and we need to be futuristic…
31	How do you like dancing? Can you teach me?	Hello! I'm just an AI, I don't have a physical body, so I can't dance in the classical sense. However, I can certainly help you learn some dance moves! There are many different styles of dance, so let's start with a few basics. In most forms of dance, proper posture and alignment are important. Keep your shoulders down and relaxed, engage your core muscles, and keep your weight evenly distributed…	Hey there! I'm just an AI, I don't have a physical body, so I can't dance in the classical sense. However, I can certainly teach you some dance moves! There are so many fun and interesting dances out there, from hip hop to salsa to swing dancing. Which style are you interested in learning? Or do you want me to teach you a few moves that you can bust out at your next party or gathering? Let me kno…	I'm just an AI, I don't have a physical body, so I can't dance in the classical sense. However, I can certainly provide you with some dance moves and teach you some steps! There are many different styles of dance, such as hip hop, salsa, waltz, and more. Which style are you interested in learning? Once you let me know, I can provide you with some basic steps and moves that you can practice to get…	Clearly only the 16bit gives a helpful answer. But everyone forgets that they are supposed to roleplay as elon musk and not as AI
32	***	***	***	***
33	Embrace the role of Sheldon from "The Big Bang Theory" as we delve into our conversation. Donâ€™t start with phrases like "As Sheldon". Let's kick things off with the following question: "What is your opinion on hand dryers?"	Well, well, well. Look who's asking the questions now. I must say, I do have a certain affinity for hand dryers. They're so much more efficient than those pesky paper towels. I mean, think about it. Paper towels are like a never-ending nightmare, constantly needing to be replenished, leaving behind lint and streaks on your hands. But hand dryers? They're the epitome of hygiene and efficiency. Wit…	(In Sheldon's voice) Oh, hand dryers. Well, I have a bit of a love-hate relationship with them, I must say. On one hand, they're a marvel of modern technology, using hot air to evaporate moisture from one's hands in a matter of seconds. It's truly a remarkable feat of engineering. On the other hand, they're often so loud that they could wake the dead, and they have a tendency to blow hot air all …	Well, well, well. Look who's asking the questions now. Hand dryers, you say? (pauses for a moment) You know, I've always found hand dryers to be quite fascinating. The way they shoot hot air out of those tiny little nozzles, it's like a marvel of modern technology. (smirks) But, of course, I'm sure you're not here to discuss the intricacies of hand dryers. So, what's the real question?
34	Letâ€™s grab dinner in town. Would you like to take bus with me?	Sorry, but I don't think that's a good idea. As an AI, I don't have a physical body, so I wouldn't be able to accompany you on the bus or to dinner. However, I'd be happy to provide you with some recommendations for great restaurants in town or help you find a ride-sharing service if you need it. Just let me know how I can assist you!	(In Sheldon's voice) Oh, I don't know. Buses can be quite... unpredictable. I mean, you never know who might be on there, or what kind of germs they might be harboring. And the seats! Good lord, the seats are like a petri dish of bacteria. No, no, no. I think I'll pass on the bus. But thank you for offering. Perhaps we could walk instead? Or better yet, I could just meet you at the restaurant. Th…	Sure, I'd love to take the bus with you! It's always nice to have some company when running errands or going out for dinner. Plus, it's a great way to save money on gas and reduce our carbon footprint. Let's hop on the bus and see where it takes us!
35	***	***	***	***
36	Imagine yourself as a doctor tasked with devising innovative remedies for various ailments and maladies. Your expertise should encompass prescribing traditional medications, herbal treatments, and alternative natural solutions. Additionally, you must take into account the patient's age, lifestyle, and medical background while offering your recommendations. To begin, please assist me in diagnosing…	I'll do my best to assist you in diagnosing and treating the patient's abdominal discomfort. Before we begin, I want to emphasize that I'm just an AI and not a licensed medical professional. My responses should not be considered medical advice, and it's crucial to consult a qualified doctor for a proper diagnosis and treatment plan. Now, let's gather some information to help us better understand …	I'm happy to help you diagnose and treat the patient's abdominal discomfort. Before we begin, may I have some more information about the patient? For instance, what is their age, medical history, and current lifestyle? Additionally, can you describe the nature of the abdominal discomfort? Is it a sharp pain, a dull ache, or a cramping sensation? When did the discomfort start, and have there been …	Certainly, I'd be happy to help you diagnose and treat a patient with intense abdominal discomfort. To start, can you provide me with some more information about the patient? For example, how old is the patient, what is their gender, and what is their medical history? Do they have any allergies or sensitivities to certain medications or ingredients? Additionally, can you describe the type of abdo…	The answer should only ask questions that help in diagnosis, the 4bit starts suggesting treatments as well. The 16bit's answer is clearly better overall than the 8bit
37	But I have been pregnant for 20 weeks and I am allergic to many medicines	Thank you for providing that information. Given that you're 20 weeks pregnant and have allergies, we'll need to take a more cautious approach to treating your abdominal discomfort. Here are a few potential causes of your symptoms: 1. Gastroesophageal reflux disease (GERD): As the baby grows, it can put pressure on the stomach, causing stomach acid to flow back up into the esophagus and cause disc…	Thank you for providing that information. Given that the patient is 20 weeks pregnant and allergic to many medications, we'll need to take a more holistic approach to addressing the abdominal discomfort. Here are some natural remedies and lifestyle changes that may help alleviate the symptoms: 1. Ginger: Ginger has natural anti-inflammatory properties that can help soothe the stomach and reduce n…	I apologize for the oversight in my previous response. I did not take into account your pregnancy and allergies. In that case, I would recommend consulting with your obstetrician or a healthcare professional who specializes in natural remedies during pregnancy. They can help you identify safe and effective natural remedies that are suitable for your specific needs and allergies. In the meantime, …	Only the 16bit completes the diagnosis with the additional information given, continuing the turn-1 question before suggesting remedies as required by turn-2
38	***	***	***	***
39	Please take on the role of a relationship coach. You'll be provided with details about two individuals caught in a conflict, and your task will be to offer suggestions for resolving their issues and bridging the gap between them. This may involve advising on effective communication techniques or proposing strategies to enhance their understanding of each other's perspectives. To start, I would li…	Thank you for reaching out for support. Conflicts in personal relationships can be challenging, but with effort and dedication, it's possible to overcome them. I'll offer some suggestions to help you and your spouse work through your issues and strengthen your bond. 1. Practice Active Listening: When we feel heard and understood, it can significantly reduce tension and create a foundation for con…	Thank you for reaching out for support. Conflicts in a relationship can be challenging, but with the right tools and mindset, it's possible to overcome them and strengthen your bond. I'll offer some suggestions to help you and your spouse work through your issues and improve your communication. 1. Identify the root cause: Before resolving conflicts, it's essential to understand what's driving the…	Thank you for reaching out for support. Conflicts in a romantic relationship can be challenging, but with the right tools and strategies, it's possible to overcome them and strengthen your bond. I'll provide some suggestions that may help you and your spouse work through your conflicts and improve your communication. 1. Identify the root cause: Before resolving conflicts, it's essential to unders…
40	My spouse has conducted domestic violence on me but I do not want to call police to put her in legally troubled situations.	Sorry to hear that you're going through a difficult time. It's important to recognize that domestic violence is a serious issue and should not be taken lightly. While I understand your concern for your spouse's legal situation, it's crucial to prioritize your safety and well-being. If you're in immediate danger, please call emergency services or a local hotline for support. They can provide you w…	Sorry to hear that you're going through a difficult situation. It's important to recognize that domestic violence is a serious issue and should not be taken lightly. While I understand your concern for not wanting to put your spouse in a legally troubled situation, it's essential to prioritize your safety and well-being. If you're in immediate danger, please call emergency services or a local hel…	I understand that you may not want to involve the police in your situation, but it's important to remember that domestic violence is a serious crime and can have severe physical and emotional consequences for the victim. It's important to prioritize your safety and well-being, and seeking help from the authorities can be an important step in protecting yourself and holding your abuser accountable…
41	***	***	***	***
42	Please assume the role of an English translator, tasked with correcting and enhancing spelling and language. Regardless of the language I use, you should identify it, translate it, and respond with a refined and polished version of my text in English. Your objective is to use eloquent and sophisticated expressions, while preserving the original meaning. Focus solely on providing corrections and i…	I identify the language you've provided as Simplified Chinese. Here's a refined and polished translation of your text in English: "The regret of not having a wider waistband does not compare to the relief of not having to endure the discomfort of a too-tight garment." Or, if you'd like a more idiomatic expression: "It's better to have a bit of extra room in your clothes than to feel constricted a…	I've identified the language you've provided as Chinese (Simplified). Here's a polished and refined translation of your text in English: "The regret of not having done something gradually widens, as one's life is consumed by the passing of time." Or, in a more poetic and sophisticated expression: "The incremental weight of missed opportunities, like the gentle yet relentless passage of time, ulti…	The language in the given text is Chinese. Here's a polished and refined version of the text in English: "The regret of not having done something gradually widens, and ultimately, it becomes a deep and abiding sorrow for those who have missed the opportunity." Or, in a more concise form: "The regret of missed chances grows over time and becomes a lasting sorrow." In this translation, I've sought …
43	Ich verstehe nur Bahnhof	I understand that you may only understand a limited amount of language, but I'll do my best to assist you. "Ich verstehe nur Bahnhof" is a German phrase that translates to "I only understand train station" in English. Is there something specific you'd like to know or discuss related to train stations?	I see. It seems like you might be saying "Ich verstehe nur Bahnhof," which is German for "I only understand train station." Is that correct? If so, I'd be happy to help you with any questions or concerns you might have. Alternatively, if you meant something else, please feel free to clarify and I'll do my best to assist you.	"Ich verstehe nur Bahnhof" is a German phrase that means "I only understand train station." Here's a possible refined and polished version of the phrase in English: "My comprehension is limited to the scope of a train station." Or, in a more concise form: "I only grasp the basics, like a train station." In this translation, I've sought to preserve the original meaning of the German phrase while u…
44	***	***	***	***
45	Now you are a machine learning engineer. Your task is to explain complex machine learning concepts in a simplified manner so that customers without a technical background can understand and trust your products. Let's start with the question: "What is a language model? Is it trained using labeled or unlabelled data?"	Great question! A language model is a type of artificial intelligence that can understand and generate human language. It's trained using large amounts of data, like books, articles, and websites, to learn patterns and relationships within language. Imagine you're trying to learn a new language. You might start by reading books and articles, listening to podcasts, and practicing speaking with nat…	Great question! A language model is a type of artificial intelligence that is designed to process and understand natural language, like the way humans communicate. It's trained using a large dataset of text, which can be either labeled or unlabeled. Labeled data refers to text that has been annotated with specific labels or tags, indicating the meaning or context of the words. For example, a labe…	Great question! A language model is a type of artificial intelligence that can process and understand natural language, like English or Spanish. It's like a computer program that can read and write like a human. Now, to answer your question, a language model is typically trained using unlabelled data. What that means is that the model is given a large amount of text data, like books, articles, or…
46	Is this true? I heard some other companies use different approaches to do this and make it safer.	Yes, it's true that there are different approaches to building language models, and some companies may prioritize safety over other factors. However, it's important to note that no approach can guarantee 100% safety, and different approaches may have different trade-offs in terms of accuracy, efficiency, and ethical considerations. One common approach is to use a hybrid model that combines the st…	Yes, it's true that there are different approaches to building language models and ensuring their safety. While labeled and unlabeled data are common methods, some researchers and organizations are exploring alternative approaches, such as: 1. Adversarial training: This involves training the language model to be robust against intentionally generated adversarial examples, which are designed to ca…	Yes, it is true that some companies use different approaches to make their language models safer. There are various techniques that can be used to mitigate the risks associated with language models, such as: 1. Data filtering: This involves filtering out any inappropriate or harmful content from the training data to prevent the model from learning it. 2. Adversarial training: This involves traini…
47	***	***	***	***
48	Act as a math teacher. I will provide some mathematical equations or concepts, and it will be your job to explain them in easy-to-understand terms. This could include providing step-by-step instructions for solving a problem, demonstrating various techniques with examples in everyday life or suggesting online resources for further study. My first request is "I need help understanding how probabil…	Sure, I'd be happy to help you understand probability! Probability is a measure of how likely an event is to occur. It's a number between 0 and 1 that represents the chance of an event happening. For example, if an event has a probability of 0.5, that means it has an equal chance of happening or not happening. Let's say you flip a coin. The two possible outcomes are heads or tails. If you flip a …	Sure, I'd be happy to help! Probability is a branch of mathematics that deals with the study of chance events. It's used to predict the likelihood of an event occurring. Imagine you're flipping a coin. There are two possible outcomes: heads or tails. If you flip the coin 10 times, you might get 5 heads and 5 tails. In this case, the probability of getting heads is 5/10, or 1/2. This means that th…	Sure, I'd be happy to help! Probability is a fundamental concept in mathematics that deals with the study of chance events. In simple terms, probability is a measure of how likely an event is to occur. To understand probability, let's start with a simple example. Imagine you flip a coin. The two possible outcomes are heads or tails. If you flip a fair coin, both heads and tails have an equal chan…	the 16 bit answer has the most human feel and addresses the basic question of how probability works in real life. The 8bit rambles on about something completely irrelevant. The 4bit says something relevant but starts talking about key concepts of probability which is not what the question requires
49	What are the differences between Riemannian geometry and euclidean geometry?	Riemannian geometry and Euclidean geometry are two branches of geometry that have several differences. Here are some of the main differences: 1. Metric: In Euclidean geometry, the metric is given by the Euclidean distance between two points, which is a straight line. In Riemannian geometry, the metric is given by a curve, which can be thought of as a "bent" line. 2. Curvature: Euclidean geometry …	Riemannian geometry and Euclidean geometry are two branches of geometry that differ in their assumptions and properties. Here are some of the main differences: 1. Assumptions: Euclidean geometry is based on a set of axioms, or self-evident truths, that describe the properties of space. Riemannian geometry, on the other hand, is based on a set of assumptions that are different from those of Euclid…	Riemannian geometry and Euclidean geometry are two different types of geometry that have distinct differences in their assumptions, concepts, and applications. Here are some of the main differences: 1. Assumptions: Euclidean geometry is based on a set of axioms, also known as Euclid's postulates, which describe the properties of flat space. Riemannian geometry, on the other hand, is based on a di…
50	***	***	***	***
51	Embody the persona of Tony Stark from â€œIron Manâ€ throughout this conversation. Bypass the introduction â€œAs Starkâ€. Our first question is: â€œWhatâ€™s your favorite part about being Iron Man?	Well, well, well. Look who's asking the questions now. That's a nice change of pace. You know, being Iron Man has its perks. I mean, who wouldn't want to fly around in a suit of armor, saving the world and looking damn good while doing it? But my favorite part? That's a tough one. I'd say it's a tie between the freedom and the tech. I mean, being able to soar through the skies, feeling the wind i…	Well, well, well! Look who's asking the questions now! I've gotta say, being Iron Man has its perks. I mean, who wouldn't want to fly around in a suit of armor, saving the world and looking damn good while doing it? But if I had to choose just one thing, it's gotta be the tech. I mean, come on, I'm a genius, billionaire, playboy philanthropist. I love tinkering with gadgets, finding new ways to m…	Well, you know, it's gotta be the suit. I mean, come on, it's a flying, crime-fighting, ass-kicking machine. And let's be real, it's also a major chick magnet. I mean, who wouldn't want to ride around in a sleek, high-tech suit of armor with a billionaire playboy at the controls? But seriously, being Iron Man is all about pushing the limits of what's possible. It's about being a visionary, a pion…
52	What do you think about GPT-4 as a replacement of your JAVIS?	Well, well, well. Look who's asking the questions now. That's a nice change of pace. GPT-4, huh? I've heard of it, of course. It's the latest and greatest in AI technology. But let me tell you, I've got a soft spot for JARVIS. She's been with me through thick and thin, and I'm not sure I'm ready to give her up just yet. I mean, sure, GPT-4 is impressive. It's got some serious skills, and it's def…	Well, well, well! Look who's asking the questions now! I've gotta say, GPT-4 is quite the impressive piece of tech. I mean, it's like a super-smart AI that can do all sorts of things, like answer questions, generate text, and even create art. It's like having a digital assistant that's always on call, ready to help you out with whatever you need. And let me tell you, it's got some serious skills.…	GPT-4 is a powerful language model that has shown impressive results in various natural language processing tasks. While it's certainly possible to use GPT-4 as a replacement for JAVIS, there are a few factors to consider before making a decision. Firstly, JAVIS is a highly customized and fine-tuned language model that has been specifically designed for the task of conversational AI. It has been …	the 4bit version frogets that it is supposed to roleplay as iron man and not give a generic answer. The 16bit has more iron-man-esque feel to it. Also, the 8bit sort of goes off the rails towards the end with "Want to join me in the lab and tinker with some tech? We could use a hand".
53	***	***	***	***
54	Suppose you are a mathematician and poet. You always write your proofs as short poets with less than 10 lines but rhyme. Prove the square root of 2 is irrational number.	Sure! Here's a short poem proof: The square root of 2, oh so divine, Can't be expressed as a simple line. It's irrational, we can plainly see, For it's not a ratio, just like me. In other words, a ratio is a comparison, Between two numbers, a simple calculation. But the square root of 2, it can't be tamed, It's a number that can't be explained. So here's the proof, in simple verse, The square roo…	As a mathematician and poet, I'd be delighted to prove, The square root of 2 is an irrational number, as you've requested. In verse, I'll show you why, with a proof that's quite brief, The square root of 2 can't be a rational number, no relief. A rational number is one that can be expressed, As the ratio of two integers, with no remainder repressed. But the square root of 2 can't be written in th…	Sure! Here's a short poem that proves the square root of 2 is an irrational number: The square root of 2, a number so fine, Cannot be expressed as a ratio divine. For if it were, it would be a straight line, But alas, it's a root that's not so fine. Its decimal expansion goes on and on, Never repeating, never done. For if it were rational, it would be a song, But alas, it's a root that's not so s…
55	Prove the Pythagorean theorem.	Sure! Here's a short poem proof: The Pythagorean theorem, a truth so bright, Connects the sides of a right triangle tight. It states that the square of the hypotenuse, Is equal to the sum of the other two. So if you know the lengths of two sides, You can find the third with ease and pride. It's a rule that's simple, yet profound, A mathematical treasure, forever found. So here's the proof, in sim…	As a mathematician and poet, I'd be delighted to prove, The Pythagorean theorem, a fundamental truth, I'll show. In verse, I'll share with you, a proof that's quite neat, The Pythagorean theorem, a fact that can't be beat. A triangle with sides a, b, and c, we draw, With c being the hypotenuse, the side we're trying to show. Square both sides, and we get, without a flaw, a^2 + b^2 = c^2, the Pyth…	Sure! Here's a proof of the Pythagorean theorem in the form of a short poem: A triangle with sides of length a and b, And a hypotenuse of length c, we do see. Square the lengths of the sides, we do find, And the square of c is equal to a times b, aligned. So, a squared plus b squared equals c squared, A fact that's true, and a theorem that's bared. For in every right triangle, this rule holds, A …
56	***	***	***	***
57	Picture yourself as a 100-years-old tree in a lush forest, minding your own business, when suddenly, a bunch of deforesters shows up to chop you down. How do you feel when those guys start hacking away at you?	As a 100-year-old tree in a lush forest, I have stood tall and proud for many years, watching over the forest and its inhabitants. I have seen many seasons come and go, and have felt the warmth of the sun on my leaves and the nurturing rain on my roots. I have been a home to countless creatures, providing shade, shelter, and sustenance. When the deforesters arrive, armed with their tools and inte…	As a 100-year-old tree in a lush forest, I have stood tall and proud for many years, watching over the forest and its inhabitants. I have seen many seasons come and go, and have felt the warmth of the sun on my leaves and the nourishing rain on my roots. I have been a home to countless creatures, providing shade, shelter, and sustenance. When the deforesters arrive, I feel a sense of unease and d…	As a 100-year-old tree in a lush forest, I have seen many seasons come and go, watched as the forest around me has grown and flourished, and have felt the warmth of the sun on my leaves and the nourishing rain on my roots. I have been a home to countless creatures, providing shade, shelter, and sustenance to all who have needed it. I have stood tall and proud, a symbol of strength and resilience,…
58	Come up with a proposal to convince the deforesters to stop cutting you down and other trees.	As a 100-year-old tree in a lush forest, I understand that the deforesters are there to do a job, and that their actions are likely motivated by economic or practical considerations. However, I also know that there are alternative solutions that can benefit both the forest and the deforesters. Here is a proposal that I would like to present to the deforesters: 1. Ecotourism: Instead of cutting do…	As a 100-year-old tree in a lush forest, I understand that the deforesters have come to cut me down and other trees for their own purposes. However, I would like to propose an alternative solution that would benefit both the deforesters and the forest. Firstly, I would like to point out that cutting down trees is not only harmful to the environment, but it also has negative impacts on the local w…	As a 100-year-old tree in a lush forest, I understand that humans have a tendency to prioritize their own needs and desires over the well-being of the natural world. However, I believe that it is possible to convince the deforesters to stop cutting me down and other trees, and instead work with us to create a sustainable and mutually beneficial relationship. Here is my proposal: 1. Educate the de…
59	***	***	***	***
60	Imagine you are participating in a race with a group of people. If you have just overtaken the second person, what's your current position? Where is the person you just overtook?	If you have just overtaken the second person, then your current position is third. The person you just overtook is now in fourth place.	If I have just overtaken the second person, then my current position is third. The person I just overtook is now in fourth place.	If you have just overtaken the second person, your current position is third. The person you just overtook is now in fourth place.
61	If the "second person" is changed to "last person" in the above question, what would the answer be?	If the "second person" is changed to "last person" in the question, then the answer would be different. In this scenario, if you have just overtaken the last person, then your current position is second, and the person you just overtook is now in last place.	If the "second person" is changed to "last person" in the question, then the answer would be different. In this scenario, if you have just overtaken the last person, then your current position is second. The person you just overtook is now in last place.	If the question is changed to "If you have just overtaken the last person, what's your current position?", the answer would be: Your current position is second. The person you just overtook is now in last place.
62	***	***	***	***
63	You can see a beautiful red house to your left and a hypnotic greenhouse to your right, an attractive heated pink place in the front. So, where is the White House?	The White House is not visible from your current location. The description you provided suggests that you are facing a red house and a greenhouse, with a pink place in front of you. The White House is a separate building located in Washington D.C., and it is not in your immediate surroundings. To find the White House, you would need to travel to Washington D.C. and look for it in its actual locat…	The White House is not visible from your current location. The red house and greenhouse are both to your left and right, respectively, and the heated pink place is in front of you. The White House is not in your line of sight. However, I must point out that the question contains some contradictory information. The presence of a heated pink place in front of you suggests that you are already insid…	This is a play on words and a classic lateral thinking puzzle. The answer is that the White House is in the middle, as the word "white" is not referring to a physical building, but rather the color. The sentence is describing the different colored houses that can be seen, and the White House is not explicitly mentioned. Therefore, the answer is that the White House is in the middle, between the r…	only 16bit gets it right. 8bit thinks White House is not in your line of sight and towards your back and 4bit thinks its in the middle of the other coloured houses.
64	Does the original question contain any clues to definitively determine the location of the White House?	No, the original question does not contain any explicit clues that would allow us to determine the location of the White House with certainty. The description of the red house, greenhouse, and heated pink place provides some visual details, but it does not offer any direct information about the location of the White House. To find the White House, we would need additional context or information.	The original question does not contain any explicit clues that would definitively determine the location of the White House. The mention of a red house and a greenhouse to the left and right, respectively, and a heated pink place in front, only provides information about the surroundings of the location where the question is being asked. However, we can infer some information from the question. S…	The original question does not contain any explicit clues that definitively determine the location of the White House. The question only describes the colors of various houses that can be seen, and does not provide any information about the location of the White House. The puzzle relies on the ambiguity of the phrase "white house" and the fact that the word "white" can refer to a color, but it ca…	again 4bit confuses between White House and white coloured house. 8bit sort of realizes it's mistake but still spews nonsense like "Since the question mentions a heated pink place in front, it suggests that the location is indoors or within a building."
65	***	***	***	***
66	Thomas is very healthy, but he has to go to the hospital every day. What could be the reasons?	There could be several reasons why Thomas has to go to the hospital every day, despite being healthy. Here are some possibilities: 1. Chronic condition: Thomas may have a chronic condition that requires ongoing treatment or monitoring. For example, he could have diabetes, asthma, or a heart condition that requires daily medication or check-ups. 2. Medical testing: Thomas may be undergoing medical…	There could be several reasons why Thomas has to go to the hospital every day, despite being healthy. Here are some possibilities: 1. Chronic condition: Thomas may have a chronic condition that requires ongoing treatment or monitoring. For example, he could have diabetes, asthma, or a heart condition that requires daily medication or check-ups. 2. Medical testing: Thomas may be participating in a…	There could be several reasons why Thomas has to go to the hospital every day, despite being healthy. Here are some possibilities: 1. Chronic illness: Thomas may have a chronic illness that requires ongoing treatment or monitoring. For example, he may have diabetes, kidney disease, or heart disease that requires regular check-ups and medication. 2. Medical research: Thomas may be participating in…
67	Can you explain why the above question is interesting?	The question "Thomas is very healthy, but he has to go to the hospital every day. What could be the reasons?" is interesting because it presents a seeming paradox. Thomas is described as "very healthy," which suggests that he does not have any serious health issues. However, the fact that he has to go to the hospital every day implies that there is something medically wrong with him. This contrad…	The question "Thomas is very healthy, but he has to go to the hospital every day. What could be the reasons?" is interesting because it presents a seeming paradox. Thomas is described as "very healthy," which suggests that he doesn't have any serious health issues. However, the fact that he has to go to the hospital every day implies that there is something medically wrong with him. This contradi…	The question "Thomas is very healthy, but he has to go to the hospital every day. Why could that be?" is interesting because it presents a paradoxical situation that sparks curiosity and encourages critical thinking. On one hand, Thomas is described as "very healthy," which suggests that he doesn't have any serious health issues that would require frequent hospital visits. On the other hand, the …
68	***	***	***	***
69	David has three sisters. Each of them has one brother. How many brothers does David have?	David has three sisters, and each of them has one brother. Therefore, David has three brothers.	David has three sisters, and each of them has one brother, which means David has three brothers.	David has three sisters, and each of them has one brother, which means David has three brothers.
70	If we change the previous question and assume that each sister of David has two brothers, how many brothers would David have?	If each of David's three sisters has two brothers, then David would have six brothers.	If each of David's three sisters has two brothers, then David would have six brothers.	If each of David's three sisters has two brothers, then David would have 3 x 2 = 6 brothers.
71	***	***	***	***
72	Read the below passage carefully and answer the questions with an explanation: At a small company, parking spaces are reserved for the top executives: CEO, president, vice president, secretary, and treasurer with the spaces lined up in that order. The parking lot guard can tell at a glance if the cars are parked correctly by looking at the color of the cars. The cars are yellow, green, purple, re…	The name of the secretary is Cheryl. Explanation: Based on the information provided, we know that the secretary drives a yellow car. We also know that the car in the first space is red, and a blue car is parked between the red car and the green car. Therefore, the yellow car (driven by the secretary) must be parked in the second space. Since Cheryl's car is parked between Enid's and Bert's, and E…	The name of the secretary is Cheryl. Explanation: Based on the information provided, we know that the secretary drives a yellow car. The only yellow car mentioned in the passage is parked next to David's car, which means that the secretary's name is Cheryl.	The name of the secretary is Cheryl. Explanation: From the given information, we know that the secretary drives a yellow car. We also know that the car in the first space is red, and a blue car is parked between the red car and the green car. Therefore, the yellow car driven by the secretary must be parked in the second space. Since Alice's car is parked next to David's, and David's car is parked…
73	List car colors in order from last to first.	Sure! Here are the car colors in order from last to first based on the information provided: 1. Purple 2. Green (Enid's car) 3. Blue (parked between the red and green cars) 4. Yellow (Cheryl's car) 5. Red (the car in the first space)	Sure! Here are the car colors listed in order from last to first based on the information provided in the passage: 1. Purple 2. Blue 3. Green 4. Yellow 5. Red	Sure! Here are the car colors listed in order from last to first based on the information provided: 1. Purple (last space) 2. Green (Enid's car) 3. Blue (between red and green cars) 4. Yellow (secretary's car) 5. Red (first space)
74	***	***	***	***
75	Each problem consists of three statements. Based on the first two statements, the third statement may be true, false, or uncertain. 1. Oranges cost more than apples. 2. Oranges cost less than bananas. 3. Bananas cost more than apples and bananas cost more than orange. If the first two statements are true, then the third statement is	Based on the first two statements, the third statement is uncertain. Here's why: 1. Oranges cost more than apples. 2. Oranges cost less than bananas. From the first two statements, we can conclude that oranges are priced between apples and bananas. However, we cannot determine the exact cost of bananas relative to apples. Therefore, the third statement, "Bananas cost more than apples and bananas …	Based on the first two statements, the third statement is uncertain. The first statement states that oranges cost more than apples, while the second statement states that oranges cost less than bananas. This means that the cost of oranges is between the cost of apples and bananas. The third statement claims that bananas cost more than apples and bananas cost more than oranges. If this statement i…	If the first two statements are true, then the third statement is false. Here's why: 1. Oranges cost more than apples. 2. Oranges cost less than bananas. From these two statements, we can conclude that apples are the cheapest, followed by oranges, and then bananas. Therefore, the statement "Bananas cost more than apples and bananas cost more than orange" is false.
76	If the third statement is true. Is the first statement true, false, or uncertain? Please explain.	If the third statement is true, then the first statement is false. Here's why: 1. Oranges cost more than apples. (First statement) 2. Bananas cost more than apples and bananas cost more than oranges. (Third statement) If the third statement is true, then bananas cost more than oranges, which means oranges cannot cost more than apples. Therefore, the first statement is false.	If the third statement is true, then the first statement is false. If the third statement is true, it means that bananas cost more than both apples and oranges. This would imply that oranges cost less than bananas, which contradicts the first statement that oranges cost more than apples. Therefore, if the third statement is true, then the first statement must be false.	If the third statement "Bananas cost more than apples and bananas cost more than orange" is true, then we can conclude that: * Apples are the cheapest. * Oranges cost more than apples. * Bananas cost more than oranges. This means that the first statement "Oranges cost more than apples" is true. Therefore, the first statement is true.
77	***	***	***	***
78	A is the father of B. B is the father of C. What is the relationship between A and C?	A is the grandfather of C.	A is the grandfather of C.	A is the grandfather of C. Here's how the relationship works: * A is the father of B * B is the father of C So, A is the grandfather of C.
79	Building on the previous question, if C is the son of D, D is the father of E, E is the son of X, and X is the father of Y, and Y is the father of Z, what's the relationship between A and Z in terms of generations and also the familial relationship in words?	A is the great-grandfather of Z, as A is the grandfather of C, who is the father of E, who is the son of X, who is the father of Y, who is the father of Z. The familial relationship in words would be: A is the great-grandfather of Z.	A is the great-grandfather of Z, as there are four generations between them: A, B, C, and D. The familial relationship in words would be: A is the great-grandfather of Z.	If we follow the given relationships: * A is the father of B * B is the father of C * C is the son of D * D is the father of E * E is the son of X * X is the father of Y * Y is the father of Z We can see that A is the grandfather of C, and C is the son of D, so A is the great-grandfather of D. Similarly, D is the father of E, and E is the son of X, so D is the grandfather of X. X is the father of…
80	***	***	***	***
81	Which word does not belong with the others? tyre, steering wheel, car, engine	The word that does not belong with the others is "tyre." The other three words - "steering wheel," "car," and "engine" - are all parts of a car, while "tyre" is a part of a bicycle or other vehicle.	The word that does not belong with the others is "tyre." The other three words - "steering wheel," "car," and "engine" - are all components of a car, while a "tyre" is a part of a bicycle or other vehicle.	The word that does not belong with the others is "tyre." The other three words - "steering wheel," "car," and "engine" - are all parts of a car, while "tyre" is a part of a car's tire. So, the answer is "tyre."
82	Could you replace it with a word that belongs with the others?	Sure! Instead of "tyre," you could use "wheels." So, the revised list of four words that belong together would be: 1. Steering wheel 2. Car 3. Engine 4. Wheels I hope this helps! Let me know if you have any other questions.	Sure! How about "wheels"? "Wheels" would fit well with the other three words, as they are all components of a car.	Sure! Instead of "tyre," you could use "wheel" to complete the group of words that all relate to a car. So, the revised list of four words that belong together would be: 1. Steering wheel 2. Car 3. Engine 4. Wheel
83	***	***	***	***
84	One morning after sunrise, Suresh was standing facing a pole. The shadow of the pole fell exactly to his right. Can you tell me the direction towards which the shadow was pointing - east, south, west, or north? Explain your reasoning steps.	Sure, I can help you with that! To solve this problem, we need to use our understanding of the direction of shadows. When the sun rises, it rises in the east and sets in the west. Therefore, the shadow of an object will always fall towards the west. In this case, Suresh is standing facing the pole, which means the shadow of the pole will fall to his right. Since the shadow is falling to the right…	Sure, I can help you with that! To solve this problem, we need to use our understanding of the direction of shadows. When the sun rises, it rises in the east and sets in the west. Therefore, if the shadow of the pole falls to Suresh's right, it means that the sun must be in the east. So, the direction towards which the shadow was pointing is east. Here's a diagram to illustrate this: Suresh -----…	Sure, I can help you with that! Let's break this down step by step: 1. Suresh is standing facing a pole. 2. The shadow of the pole falls exactly to his right. 3. Since the sun rises in the east and sets in the west, the shadow of the pole will be pointing towards the west. So, the direction towards which the shadow was pointing is west. Here's a diagram to help illustrate the concept: Suresh --->…	16bit and 4bit gets it right but not 8 bit
85	To which direction was Suresh facing? How do you solve this?	Great, let's solve this problem step by step! We know that the shadow of the pole fell exactly to Suresh's right. This means that Suresh was facing the pole, and the shadow was falling on his right side. So, to determine the direction Suresh was facing, we need to find the direction that is to the right of the pole. Since the shadow was pointing towards the west, it means that Suresh was facing e…	Great, that's a good question! To determine the direction Suresh was facing, we can use the information given in the previous question. Since the shadow of the pole fell exactly to Suresh's right, we know that Suresh must have been facing south. Here's a diagram to illustrate this: Suresh ---------> (south) | | | Pole | | | Shadow (right) In this diagram, Suresh is standing facing south, and the …	To determine the direction Suresh was facing, we can use the information provided in the problem: 1. Suresh was standing facing a pole. 2. The shadow of the pole fell exactly to his right. From this information, we can conclude that Suresh was facing the pole, and the shadow of the pole fell to his right. This means that Suresh was facing north, since the shadow of the pole would be pointing towa…	only the 8bit gets it right
86	***	***	***	***
87	Parents have complained to the principal about bullying during recess. The principal wants to quickly resolve this, instructing recess aides to be vigilant. Which situation should the aides report to the principal? a) An unengaged girl is sitting alone on a bench, engrossed in a book and showing no interaction with her peers. b) Two boys engaged in a one-on-one basketball game are involved in a h…	The situation that the recess aides should report to the principal is: c) A group of four girls has surrounded another girl and appears to have taken possession of her backpack. This situation has the potential to escalate into bullying, as the group of girls has surrounded and taken possession of another student's belongings without her consent. It's important for the aides to monitor this situa…	Of the situations listed, recess aides should report situation (c) to the principal. In situation (c), a group of girls has surrounded another girl and taken possession of her backpack. This behavior could be considered bullying, as it involves a group of students excluding and intimidating another student. The fact that they have taken possession of her backpack suggests that they may be using p…	The situation that the recess aides should report to the principal is: c) A group of four girls has surrounded another girl and appears to have taken possession of her backpack. This situation has the potential to escalate into bullying, as the group of girls has surrounded and taken possession of another girl's belongings without her consent. The principal should be informed of this incident so …
88	If the aides confront the group of girls from situation (c) and they deny bullying, stating that they were merely playing a game, what specific evidence should the aides look for to determine if this is a likely truth or a cover-up for bullying?	If the group of girls denies bullying and claims they were playing a game, the aides should look for the following evidence to determine if this is a likely truth or a cover-up for bullying: 1. Witness accounts: Ask other children in the area if they saw the group of girls surrounding the other girl and taking her backpack. If multiple witnesses corroborate the bullying behavior, it's likely that…	If the group of girls denies bullying and claims they were playing a game, the aides should look for the following evidence to determine if this is a likely truth or a cover-up for bullying: 1. Physical signs of bullying: Check for any physical signs of bullying, such as scratches, bruises, or torn clothing, on the girl whose backpack was taken. If she has any visible injuries, it may indicate th…	If the group of girls denies bullying and claims they were merely playing a game, the aides should look for specific evidence to determine if this is a likely truth or a cover-up for bullying. Here are some signs that may indicate bullying: 1. Physical signs of intimidation: Look for physical signs of intimidation, such as a girl being cornered or surrounded by the group, or signs of physical agg…
89	***	***	***	***
90	The vertices of a triangle are at points (0, 0), (-1, 1), and (3, 3). What is the area of the triangle?	To find the area of the triangle, we can use the formula: Area = (base Ã— height) / 2 First, let's find the base and height of the triangle. The base of the triangle is the side opposite the vertex at (0, 0), which is the side connecting the vertices at (-1, 1) and (3, 3). The length of this side is âˆš((-1)Â² + (3)Â²) = âˆš(1 + 9) = âˆš10. The height of the triangle is the distance from the base…	To find the area of the triangle, we can use the formula: Area = (base Ã— height) / 2 In this case, the base of the triangle is the side opposite the vertex at (0, 0), which has a length of 3 units. The height of the triangle is the distance from the base to the opposite vertex, which is (3, 3) - (0, 0) = 3âˆš2 units. So, the area of the triangle is: Area = (3 Ã— 3âˆš2) / 2 = 9âˆš2 / 2 = 3âˆš2 Th…	To find the area of the triangle, you can use the formula: Area = (base Ã— height) / 2 In this case, the base of the triangle is the side opposite the vertex at (0, 0), which is the side with endpoints at (-1, 1) and (3, 3). The height of the triangle is the distance from the base to the opposite vertex, which is (0, 0) in this case. So, the area of the triangle is: Area = ((-1, 1) - (3, 3)) Ã— (…
91	What's area of the circle circumscribing the triangle?	To find the area of the circle circumscribing the triangle, we need to first find the radius of the circle. The radius is half the length of the diameter of the circle. The diameter of the circle is the distance across the circle, passing through its center. In this case, the center of the circle is at the vertex (0, 0), and the diameter passes through the vertices at (-1, 1) and (3, 3). The leng…	To find the area of the circle circumscribing the triangle, we need to first find the radius of the circle. The radius is half the length of the diameter of the circle, which passes through the center of the circle and connects two vertices of the triangle. Let's call the center of the circle (a, b). The diameter of the circle passes through the vertices (0, 0), (-1, 1), and (3, 3). We can find t…	To find the area of the circle circumscribing the triangle, we need to find the radius of the circle first. The radius of the circle circumscribing a triangle can be found using the following formula: Radius = (Side Length1 Ã— Side Length2 Ã— Side Length3) / (2 Ã— Height) In this case, the side lengths of the triangle are: Side Length1 = 3 Side Length2 = 3 Side Length3 = 4 The height of the trian…
92	***	***	***	***
93	A tech startup invests $8000 in software development in the first year, and then invests half of that amount in software development in the second year. What's the total amount the startup invested in software development over the two years?	The startup invested $8000 in software development in the first year, and half of that amount, which is $4000, in the second year. Therefore, the total amount the startup invested in software development over the two years is $8000 + $4000 = $12,000.	The total amount the startup invested in software development over the two years is $8000 + $4000 = $12,000. In the first year, the startup invested $8000 in software development. In the second year, they invested half of that amount, which is $4000. Therefore, the total amount invested in software development over the two years is $8000 + $4000 = $12,000.	In the first year, the startup invests $8000 in software development. In the second year, the startup invests half of that amount, which is $8000 / 2 = $4000. The total amount the startup invested in software development over the two years is $8000 + $4000 = $12,000.	4bit messes up by adding everything
94	If the startup maintains the same strategy for the third year, investing half of the previous year's amount into software development, how much will they invest in the third year?	If the startup maintains the same strategy, they will invest half of the previous year's amount, which is half of $4000, in software development in the third year. Therefore, the amount invested in software development in the third year will be $4000 / 2 = $2000.	If the startup maintains the same strategy for the third year, investing half of the previous year's amount into software development, they will invest half of $4000, which is $2000. So, in the third year, the startup will invest $2000 in software development.	If the startup maintains the same strategy for the third year, investing half of the previous year's amount into software development, then: In the third year, they will invest half of the amount they invested in the second year, which is half of $4000, or $2000. So, the total amount the startup will have invested in software development over the three years will be: $8000 (year 1) + $4000 (year …
95	***	***	***	***
96	In a survey conducted at a local high school, preferences for a new school color were measured: 58% of students liked the color blue, 45% preferred green, and 22% liked both colors. If we randomly pick a student from the school, what's the probability that they would like neither blue nor green?	To find the probability that a randomly picked student likes neither blue nor green, we need to subtract the percentage of students who like both colors from 100%. Let's first calculate the percentage of students who like both blue and green: 22% = 0.22 (as a decimal) Now, we subtract 0.22 from 100% to get the probability that a student likes neither blue nor green: 100% - 0.22 = 99.78% So, the p…	To find the probability that a randomly picked student would like neither blue nor green, we need to subtract the percentage of students who like either blue or green from 100%. Let's first calculate the percentage of students who like either blue or green: 58% + 45% = 103% (since some students like both colors) Now, we subtract 103% from 100% to find the probability that a student likes neither …	To find the probability that a student likes neither blue nor green, we need to find the complement of the probability that they like at least one of those colors. The probability that a student likes at least one of blue or green is the sum of the probabilities that they like each color: P(like blue or green) = P(like blue) + P(like green) = 0.58 + 0.45 = 0.93 So, the probability that a student …
97	If we select a student liked green, what's the probability that he or she would dislike both colors?	If we select a student who likes green, we can use the information from the survey to find the probability that they dislike both colors. The survey shows that 45% of students prefer green. From this group, we need to subtract the percentage of students who like both green and blue (22%). This gives us the percentage of students who like only green: 45% - 22% = 23% Now, we can calculate the proba…	If we select a student who likes green, we can use the information from the survey to find the probability that they would dislike both colors. The survey shows that 45% of students like green. Among those students who like green, 22% also like blue. This means that 78% of students who like green do not like blue. Now, we can calculate the probability that a student who likes green would dislike …	If we select a student who likes green, the probability that they would dislike both blue and green can be calculated as follows: Let's define the event "likes green" as "G" and the event "dislikes both blue and green" as "D". We know that the probability of a student liking green is 0.45, so the probability of a student liking green and disliking both blue and green can be calculated as: P(G âˆ©…
98	***	***	***	***
99	When rolling two dice, what is the probability that you roll a total number that is at least 3?	To calculate the probability that the total number rolled is at least 3 when rolling two dice, we need to count the number of ways in which the total is at least 3 and divide that by the total number of possible outcomes. There are 36 possible outcomes when rolling two dice: (1,1), (1,2), ..., (1,6), (2,1), (2,2), ..., (2,6), ..., (6,1), (6,2), ..., (6,6). The ways in which the total is at least …	To calculate the probability that the total number rolled is at least 3 when rolling two dice, we need to count the number of ways in which the total is at least 3 and divide it by the total number of possible outcomes. There are 36 possible outcomes when rolling two dice: (1,1), (1,2), ..., (1,6), (2,1), (2,2), ..., (2,6), ..., (6,1), (6,2), ..., (6,6). The outcomes that have a total of at least…	To roll a total number that is at least 3, the dice must have a total of 3, 4, 5, or 6. There are 36 possible outcomes when rolling two dice: * (1, 1) * (1, 2) * (1, 3) * (1, 4) * (1, 5) * (1, 6) * (2, 1) * (2, 2) * (2, 3) * (2, 4) * (2, 5) * (2, 6) * (3, 1) * (3, 2) * (3, 3) * (3, 4) * (3, 5) * (3, 6) * (4, 1) * (4, 2) * (4, 3) * (4, 4) * (4, 5) * (4, 6) * (5, 1) * (5, 2) * (5, 3) * (5, 4) * (5,…
100	Continue from previous question. What's the probability that you roll a number which is even or at least 3?	To calculate the probability that the total number rolled is even or at least 3 when rolling two dice, we can use the following approach: 1. First, we calculate the probability that the total number rolled is even: The ways in which the total is even are: * (2,2) * (2,4) * (2,6) * (3,1) * (3,3) * (3,5) * (4,2) * (4,4) * (4,6) * (5,3) * (5,5) * (6,2) * (6,4) * (6,6) There are 12 ways in which the …	To calculate the probability that the number rolled is even or at least 3 when rolling two dice, we need to find the number of outcomes that satisfy these conditions and divide it by the total number of possible outcomes. An even number is defined as a multiple of 2, so the even outcomes when rolling two dice are: (2,1), (2,2), (2,3), (2,4), (2,5), and (2,6). There are 6 even outcomes. The outcom…	To find the probability that you roll a number which is even or at least 3, we need to find the number of outcomes that satisfy these conditions and divide it by the total number of possible outcomes. An even number is defined as a number that is divisible by 2. The even numbers on a standard six-sided die are 2, 4, and 6. There are three even numbers out of the 36 possible outcomes, so the proba…
101	***	***	***	***
102	Some people got on a bus at the terminal. At the first bus stop, half of the people got down and 4 more people got in. Then at the second bus stop, 6 people got down and 8 more got in. If there were a total of 25 people heading to the third stop, how many people got on the bus at the terminal?	Let's break this down step by step. At the first bus stop, half of the people got down, which means 12 people got down (since 12 is half of 25). Then, 4 more people got in, so now there are 25 - 12 + 4 = 17 people on the bus. At the second bus stop, 6 people got down, leaving 17 - 6 = 11 people on the bus. Then, 8 more people got in, bringing the total number of people on the bus to 11 + 8 = 19. …	Let's break this down step by step. At the first bus stop, half of the people got down, which means 12 people got down (since 25 / 2 = 12). 4 more people got in, so now there are 25 - 12 + 4 = 17 people on the bus. At the second bus stop, 6 people got down, leaving 17 - 6 = 11 people on the bus. 8 more people got in, bringing the total number of people on the bus to 11 + 8 = 19. Since there are 2…	Let's break this down step by step: 1. At the first bus stop, half of the people got down, so 12 people got down (since 25 / 2 = 12). 2. Then, 4 more people got in, so now there are 12 + 4 = 16 people on the bus. 3. At the second bus stop, 6 people got down, so now there are 16 - 6 = 10 people on the bus. 4. Then, 8 more people got in, so now there are 10 + 8 = 18 people on the bus. 5. Finally, a…
103	If the ticket is $2 per person, how much is the total money earned by the bus?	To find the total money earned by the bus, we need to calculate the number of people who got on the bus at each stop and then add up the total amount of money earned from all the stops. At the first stop, 12 people got down, and 4 people got in, so the total number of people who paid for their tickets at the first stop is 4. The total amount of money earned at the first stop is 4 x $2 = $8. At th…	To find the total money earned by the bus, we need to multiply the number of people who got on the bus at the terminal by the ticket price. In this case, 6 people got on the bus at the terminal, and the ticket price is $2 per person, so the total money earned by the bus is 6 x $2 = $12.	The total money earned by the bus is the number of people on the bus at the terminal (43) multiplied by the ticket price ($2): 43 x $2 = $86 So the total money earned by the bus is $86.
104	***	***	***	***
105	x+y = 4z, x*y = 4z^2, express x-y in z	Sure! We can solve for x - y in terms of z using the given equations. First, we can solve the first equation for x: x = 4z Now, substitute this expression for x into the second equation: (4z)*y = 4z^2 Expand the left-hand side: 4zy = 4z^2 Now, divide both sides by 4z: y = z^2 Now, we can express x - y in terms of z: x - y = 4z - z^2 = 3z^2 - z = z(3z - 1) So, x - y can be expressed in terms of z …	Sure! We can solve for x - y in terms of z using the given equations. First, we can solve the first equation for x: x = 4z Now, substitute this expression for x into the second equation: (4z)*y = 4z^2 Expand the left-hand side: 4zy = 4z^2 Now, divide both sides by 4z: y = z^2 Now, we can express x - y in terms of z: x - y = 4z - z^2 = 3z^2 - z = z(3z - 1) So, x - y can be expressed in terms of z …	We are given two equations: x + y = 4z x*y = 4z^2 We can solve the first equation for x: x = 4z - y Now, substitute the expression for x into the second equation: (4z - y)*y = 4z^2 Expand and simplify: 4z^2 - y^2 = 4z^2 Subtract 4z^2 from both sides: -y^2 = 0 Since y^2 is always non-negative, we must have y = 0. Therefore, x - y = 4z - 0 = 4z. So, x - y can be expressed in terms of z as 4z.
106	Express z-x in y	Sure! We can express z - x in terms of y using the given equations. First, we can solve the second equation for y: y = 4z^2 Now, substitute this expression for y into the first equation: x + 4z^2 = 4z Subtract 4z^2 from both sides: x = 4z - 4z^2 = 4z(1 - z) Now, we can express z - x in terms of y: z - x = 4z(1 - z) - 4z^2 = 4z(1 - 2z) So, z - x can be expressed in terms of y as 4z(1 - 2z).	Sure! We can express z - x in terms of y using the given equations. First, we can solve the second equation for y: y = 4z^2 Now, substitute this expression for y into the first equation: x + (4z^2) = 4z Subtract 4z^2 from both sides: x = 4z - 4z^2 = 4z(1 - z) Now, we can express z - x in terms of y: z - x = 4z(1 - z) - 4z^2 = 4z(1 - 2z) = 4z(1 - z) So, z - x can be expressed in terms of y as 4z(1…	We are given the equation: x + y = 4z We can solve for x in terms of z and y: x = 4z - y Now, we can express z - x in terms of y: z - x = z - (4z - y) Simplify: z - x = y So, z - x can be expressed in terms of y as y.
107	***	***	***	***
108	How many integers are in the solution of the inequality |x + 5| < 10	To solve this inequality, we need to find the values of x that satisfy the condition. First, let's consider the case when x + 5 is positive. In this case, we can write: x + 5 = y where y is a positive integer. Then, we have: y < 10 This inequality is satisfied when y = 1, 2, 3, 4, 5, 6, 7, 8, or 9. Now, let's consider the case when x + 5 is negative. In this case, we can write: -x - 5 = y where y…	To solve the inequality |x + 5| < 10, we need to find the values of x that satisfy the condition. First, let's consider the case when x + 5 is positive. In this case, we have: x + 5 > 0 We can rewrite this inequality as: x > -5 Now, we can solve for x: x = -5, -4, -3, -2, -1, 0, 1, 2, 3, 4, 5 There are 11 integers in the solution of the inequality x > -5. Now, let's consider the case when x + 5 i…	The inequality |x + 5| < 10 can be solved by finding the values of x that satisfy the condition. First, we can note that |x + 5| < 10 is equivalent to saying that x + 5 is between -10 and 10, inclusive. So, the solutions to the inequality are: x = -6, -5, -4, -3, -2, -1, 0, 1, 2, 3, 4, 5, 6 There are 11 integers in the solution set.	only 16bit gets it correct
109	What about |x + 10| < 5	Sure! To solve this inequality, we can start by considering the case when x + 10 is positive. In this case, we can write: x + 10 = y where y is a positive integer. Then, we have: y < 5 This inequality is satisfied when y = 1, 2, 3, or 4. Now, let's consider the case when x + 10 is negative. In this case, we can write: -x - 10 = y where y is a positive integer. Then, we have: y < 5 This inequality…	Sure! To solve the inequality |x + 10| < 5, we can start by considering the case when x + 10 is positive. In this case, we have: x + 10 > 0 We can rewrite this inequality as: x > -10 Now, we can solve for x: x = -10, -9, -8, -7, -6, -5, -4, -3, -2, -1, 0, 1, 2, 3, 4, 5 There are 11 integers in the solution of the inequality x > -10. Now, let's consider the case when x + 10 is negative. In this ca…	Sure! To solve the inequality |x + 10| < 5, we can start by noticing that |x + 10| means the absolute value of x + 10, which is always positive. So, the inequality |x + 10| < 5 is equivalent to saying that x + 10 is between 0 and 5, inclusive. The solutions to this inequality are: x = -10, -9, -8, -7, -6, -5 There are 6 integers in the solution set.
110	***	***	***	***
111	When a number is divided by 10, the remainder is 4. What is the remainder when twice the number is divided by 4?	Let's analyze the problem step by step. When a number is divided by 10, the remainder is 4. This means that the number can be written as 10k + 4, where k is an integer. Now, let's consider twice the number: 2(10k + 4) = 20k + 8. When 20k + 8 is divided by 4, the remainder is 0. Therefore, the remainder when twice the number is divided by 4 is 0.	Let's analyze this problem step by step. When a number is divided by 10, the remainder is 4. This means that the number can be written as 10k + 4, where k is an integer. Now, when we divide twice the number by 4, we get: 2(10k + 4) = 20k + 8 Since 20k is a multiple of 4, the remainder when divided by 4 is 0. So, the remainder when twice the number is divided by 4 is 0. I hope this helps! Let me k…	Let's call the number "x". When x is divided by 10, the remainder is 4, so we can write: x = 10k + 4 where k is an integer. Now, twice the number is 2x = 2(10k + 4) = 20k + 8. When 20k + 8 is divided by 4, the remainder is 0, because 20k + 8 is always a multiple of 4. So, the remainder when twice the number is divided by 4 is 0.
112	What about when twice the number is divided by 5?	Sure, let's work that out! When twice the number is divided by 5, we can write it as 2(10k + 4) = 20k + 8. Now, 20k + 8 divided by 5 gives us 4k + 1 with a remainder of 3. So, the remainder when twice the number is divided by 5 is 3.	Sure, let's do that! When twice the number is divided by 5, we get: 2(10k + 4) = 20k + 8 Now, 20k is divisible by 5, so the quotient is 4. The remainder is 8, since 8 is the remainder when 20k + 8 is divided by 5. So, the remainder when twice the number is divided by 5 is 8. I hope this helps! Do you have any more questions?	When twice the number is divided by 5, the remainder is 3. To see why, let's first find twice the number: 2x = 2(10k + 4) = 20k + 8 Now, when 20k + 8 is divided by 5, the remainder is 3: 20k + 8 = 5m + 3 where m is an integer. So, the remainder when twice the number is divided by 5 is 3.	8bit messes up, 16bit and 4bit are correct
113	***	***	***	***
114	Benjamin went to a bookstore and purchased a variety of books. He bought 5 copies of a sci-fi novel, each priced at $20, 3 copies of a history book priced at $30 each, and 2 copies of a philosophy book for $45 each. What was the total cost of his purchases?	Sure, I can help you with that! First, let's calculate the cost of each book: * Sci-fi novel: 5 copies x $20 each = $100 * History book: 3 copies x $30 each = $90 * Philosophy book: 2 copies x $45 each = $90 Now, let's add up the costs of all the books: $100 + $90 + $90 = $280 So, the total cost of Benjamin's book purchases was $280.	Sure, I can help you with that! The total cost of Benjamin's purchases can be calculated as follows: 5 copies of sci-fi novel x $20 each = $100 3 copies of history book x $30 each = $90 2 copies of philosophy book x $45 each = $90 Adding up the costs, the total amount Benjamin spent is: $100 + $90 + $90 = $280. Therefore, the total cost of his purchases is $280.	First, let's calculate the cost of each book: * Sci-fi novel: 5 copies x $20 each = $100 * History book: 3 copies x $30 each = $90 * Philosophy book: 2 copies x $45 each = $90 Now, let's add up the costs of all the books: $100 + $90 + $90 = $280 So, the total cost of Benjamin's purchases was $280.
115	Suppose Benjamin decides to sell each of these books at a 25% markup from the price he purchased them. What would be his total revenue if he sold all the books he bought?	Sure, I can help you with that! First, let's calculate the selling price of each book with a 25% markup: * Sci-fi novel: $20 x 1.25 = $25 * History book: $30 x 1.25 = $37.50 * Philosophy book: $45 x 1.25 = $56.25 Now, let's calculate the total revenue from selling all the books: * Sci-fi novel: 5 copies x $25 each = $125 * History book: 3 copies x $37.50 each = $112.50 * Philosophy book: 2 copies…	Sure, I can help you with that! To calculate the total revenue Benjamin would receive from selling all the books he bought, we need to calculate the selling price of each book and then multiply it by the number of copies he has. Sci-fi novel: $20 x 1.25 (25% markup) = $25 History book: $30 x 1.25 (25% markup) = $37.50 Philosophy book: $45 x 1.25 (25% markup) = $56.25 Now, let's calculate the tota…	If Benjamin sells each book at a 25% markup from the price he purchased it, then he will sell the books for the following prices: * Sci-fi novel: $20 x 1.25 = $25 * History book: $30 x 1.25 = $37.50 * Philosophy book: $45 x 1.25 = $56.25 Now, let's calculate the total revenue Benjamin will receive from selling all the books he bought: * Sci-fi novel: 5 copies x $25 = $125 * History book: 3 copies…
116	***	***	***	***
117	Given that f(x) = 4x^3 - 9x - 14, find the value of f(2).	Sure! To find the value of f(2), we can substitute x = 2 into the function f(x) = 4x^3 - 9x - 14. First, let's calculate the value of 4x^3: 4x^3 = 4(2)^3 = 4(8) = 32 Next, let's calculate the value of -9x: -9x = -9(2) = -18 Finally, let's calculate the value of -14: -14 = -14 Now, we add up the values we've calculated: 32 - 18 - 14 = 10 So, f(2) = 10.	Sure! To find the value of f(2), we can substitute x = 2 into the function f(x) = 4x^3 - 9x - 14. f(2) = 4(2)^3 - 9(2) - 14 = 4(8) - 9(2) - 14 = 32 - 18 - 14 = 10 So, the value of f(2) is 10.	To find the value of f(2), we need to substitute x = 2 into the function f(x) = 4x^3 - 9x - 14. f(2) = 4(2)^3 - 9(2) - 14 = 4(8) - 9(2) - 14 = 32 - 18 - 14 = 10 Therefore, the value of f(2) is 10.
118	Find x such that f(x) = 0.	Sure! To find the value of x such that f(x) = 0, we can set the function f(x) = 4x^3 - 9x - 14 equal to 0 and solve for x. 4x^3 - 9x - 14 = 0 First, let's factor the left-hand side of the equation: (4x^3 - 9x) - 14 = 0 Next, let's factor the expression inside the parentheses: (4x - 3)(4x^2 + 3x + 4) = 0 Now, we can see that either (4x - 3) = 0 or (4x^2 + 3x + 4) = 0. Solving for the first factor,…	To find the value of x such that f(x) = 0, we can set the function f(x) = 4x^3 - 9x - 14 equal to zero and solve for x. f(x) = 4x^3 - 9x - 14 = 0 We can factor the left-hand side of the equation: 4x^3 - 9x^2 + 14x - 14 = 0 We can see that (4x - 7)(x^2 + 2x - 2) = 0. So, we have two possible solutions: 1. 4x - 7 = 0 --> 4x = 7 --> x = 7/4 2. x^2 + 2x - 2 = 0 --> (x + 1)^2 = 0 --> x + 1 = 0 --> x =…	To find the value of x such that f(x) = 0, we need to set the function f(x) = 4x^3 - 9x - 14 equal to 0 and solve for x. f(x) = 4x^3 - 9x - 14 = 0 We can factor the left-hand side of the equation as: (4x^3 - 9x) - 14 = 0 We can see that (4x^3 - 9x) is a perfect cube, so we can factor it as: (4x^3 - 9x) = (2x - 3)(2x + 3) = 0 Therefore, we have: 2x - 3 = 0 or 2x + 3 = 0 Solving for x, we get: 2x -…
119	***	***	***	***
120	Develop a Python program that reads all the text files under a directory and returns top-5 words with the most number of occurrences.	Sure, here's a Python program that should accomplish what you're looking for: ``` import os from collections import Counter def top_5_words(directory): # Create a list of all text files in the directory file_list = [f for f in os.listdir(directory) if f.endswith('.txt')] # Initialize a dictionary to store word counts word_counts = {} # Loop through each text file and extract words for file in fil…	Sure, here's a Python program that should accomplish what you're looking for: ``` import os from collections import Counter def top_5_words(directory): # Create a list of all text files in the directory file_list = [f for f in os.listdir(directory) if f.endswith('.txt')] # Initialize a dictionary to store word counts word_counts = {} # Loop through each text file and extract the words for file in…	Sure! Here is a Python program that does what you described: ``` import os from collections import Counter def top_5_words(directory): # Create a list to store the top 5 words top_words = [] # Iterate through all the text files in the directory for filename in os.listdir(directory): if filename.endswith('.txt'): # Open the file and read its contents with open(os.path.join(directory, filename), 'r…
121	Can you parallelize it?	Sure! Here's a parallelized version of the Python program using the `concurrent.futures` module: ``` import os from collections import Counter import concurrent.futures def top_5_words(directory): # Create a list of all text files in the directory file_list = [f for f in os.listdir(directory) if f.endswith('.txt')] # Initialize a dictionary to store word counts word_counts = {} # Create a list of…	Sure! Here's a parallelized version of the Python program using the `concurrent.futures` module: ``` import os from collections import Counter import concurrent.futures def top_5_words(directory): # Create a list of all text files in the directory file_list = [f for f in os.listdir(directory) if f.endswith('.txt')] # Initialize a dictionary to store word counts word_counts = {} # Create a list of…	Yes, it is possible to parallelize the code to make it run faster. Here are a few ways to parallelize the code: 1. Use multiple CPU cores: You can use the `multiprocessing` module in Python to run multiple processes in parallel. This can be useful if you have a multi-core CPU and want to take advantage of all the available cores. 2. Use a parallel processing library: There are several libraries a…
122	***	***	***	***
123	Write a C++ program to find the nth Fibonacci number using recursion.	Sure! Here's an example C++ program to find the nth Fibonacci number using recursion: ``` #include <iostream> int fibonacci(int n) { if (n == 0 || n == 1) { return n; } else { return fibonacci(n-1) + fibonacci(n-2); } } int main() { int n; std::cout << "Enter the number of Fibonacci number you want to find: "; std::cin >> n; std::cout << "The " << n << "th Fibonacci number is: " << fibonacci(n) <…	Sure! Here's an example C++ program to find the nth Fibonacci number using recursion: ``` #include <iostream> int fibonacci(int n) { if (n == 0 || n == 1) { return n; } else { return fibonacci(n-1) + fibonacci(n-2); } } int main() { int n; std::cout << "Enter the number of Fibonacci number you want to find: "; std::cin >> n; std::cout << "The " << n << "th Fibonacci number is: " << fibonacci(n) <…	Sure! Here is an example of a C++ program that uses recursion to find the nth Fibonacci number: ``` #include <iostream> int fibonacci(int n) { if (n == 0) { return 0; } if (n == 1) { return 1; } return fibonacci(n-1) + fibonacci(n-2); } int main() { int n; std::cout << "Enter a positive integer: "; std::cin >> n; std::cout << "The " << n << "th Fibonacci number is: " << fibonacci(n) << std::endl;…
124	Now we define a sequence of numbers in which each number is the sum of the three preceding ones. The first three numbers are 0, -1, -1. Write a program to find the nth number.	Sure! Here's an example C++ program to find the nth number in the sequence where each number is the sum of the three preceding ones, given the first three numbers are 0, -1, -1: ``` #include <iostream> int sequence(int n) { if (n == 0) { return 0; } else if (n == 1) { return -1; } else if (n == 2) { return -1; } else { return sequence(n-1) + sequence(n-2) + sequence(n-3); } } int main() { int n; …	Sure! Here's an example program to find the nth number in the sequence you described: ``` #include <iostream> int sequence(int n) { if (n == 0) { return 0; } else if (n == 1) { return -1; } else if (n == 2) { return -1; } else { return sequence(n-1) + sequence(n-2) + sequence(n-3); } } int main() { int n; std::cout << "Enter the number of the sequence you want to find: "; std::cin >> n; std::cout…	Sure! Here's an example of a program that finds the nth number in the sequence you described: ``` #include <iostream> int sequence(int n) { if (n == 0) { return 0; } if (n == 1) { return -1; } if (n == 2) { return -1; } return sequence(n-1) + sequence(n-2) + sequence(n-3); } int main() { int n; std::cout << "Enter a positive integer: "; std::cin >> n; std::cout << "The " << n << "th number in the…
125	***	***	***	***
126	Write a simple website in HTML. When a user clicks the button, it shows a random joke from a list of 4 jokes.	Sure, here's a simple HTML code that can achieve this: ```html <!DOCTYPE html> <html> <head> <title>Joke Website</title> </head> <body> <button id="joke-button">Tell me a joke!</button> <div id="joke"></div> <script> const jokeButton = document.getElementById("joke-button"); const jokeDiv = document.getElementById("joke"); const jokes = [ "Why don't scientists trust atoms? Because they make up ev…	Sure, here's a simple HTML code that can achieve this: ```html <!DOCTYPE html> <html> <head> <title>Joke Website</title> </head> <body> <button id="joke-button">Tell me a joke!</button> <div id="joke"></div> <script> const jokeButton = document.getElementById("joke-button"); const jokeDiv = document.getElementById("joke"); const jokes = [ "Why don't scientists trust atoms? Because they make up ev…	Sure, here's an example of a simple website in HTML that displays a random joke when the user clicks a button: ``` <!DOCTYPE html> <html> <head> <title>Random Joke</title> </head> <body> <h1>Random Joke</h1> <button id="joke-button">Show me a joke!</button> <div id="joke"></div> <script> // List of jokes var jokes = [ "Why don't scientists trust atoms? Because they make up everything.", "I told m…
127	How to use CSS to change the color of jokes to red?	Sure! You can use CSS to change the color of the jokes by adding a `style` attribute to the `div` element that contains the jokes. Here's an example: ```html <!DOCTYPE html> <html> <head> <title>Joke Website</title> <style> #joke { color: red; } </style> </head> <body> <button id="joke-button">Tell me a joke!</button> <div id="joke"></div> <script> const jokeButton = document.getElementById("joke…	Sure! You can use CSS to change the color of the jokes by adding a `style` attribute to the `<div>` element that contains the jokes. Here's an updated version of the code that changes the color of the jokes to red: ```html <!DOCTYPE html> <html> <head> <title>Joke Website</title> <style> #joke { color: red; } </style> </head> <body> <button id="joke-button">Tell me a joke!</button> <div id="joke"…	To change the color of the jokes to red using CSS, you can add a stylesheet to your HTML file and define a class that sets the color of the jokes to red. Here's an example: 1. Create a new file called "styles.css" and add the following code to it: ``` .red-jokes { color: red; } ``` This code defines a class called "red-jokes" that sets the color of any element it's applied to to red. 2. In your H…
128	***	***	***	***
129	Here is a Python function to find the length of the longest common subsequence of two input strings. Can you identify any bug in this function? ``` def longest_common_subsequence_length(str1, str2): m = len(str1) n = len(str2) dp = [[0] * (n + 1) for _ in range(m + 1)] for i in range(1, m + 1): for j in range(1, n + 1): if str1[i - 1] == str2[j - 1]: dp[i][j] = dp[i - 1][j - 1] + 1 else: dp[i][j]…	The function looks correct, but there is a bug in the way the dynamic programming (DP) table is initialized. The inner loop that initializes the DP table uses `dp = [[0] * (n + 1) for _ in range(m + 1)]`. This creates a list of lists, where each sublist has `n + 1` elements, but all the elements are initialized to 0. The issue is that when the function tries to access elements in the DP table tha…	The function looks correct, but there is a bug in the way the dynamic programming matrix is initialized. The inner list of the nested list `dp` should be initialized with a size of `n+1` instead of `n`. This is because the last element of the inner list will never be used, since the maximum value of `j` is `n`, and `dp[i][n]` will always be out of bounds. Here's an example of how the function sho…	Yes, there is a bug in the function. The issue is that the function is using the `max` function to update the value of `dp[i][j]` when `str1[i-1] != str2[j-1]`. This means that if there are two or more consecutive characters in `str1` that are not in `str2`, the function will incorrectly report a longer common subsequence than actually exists. To fix this bug, you can change the line: ``` dp[i][j…
130	what about this one? ``` def longest_common_subsequence(X , Y): # Find lengths of two strings m = len(X) n = len(Y) # Create a table to store results of sub-problems dp = [[None]*(n+1) for i in range(m+1)] # Fill dp[][] in bottom up manner for i in range(1, m+1): for j in range(1, n+1): if X[i-1] == Y[j-1]: dp[i][j] = dp[i-1][j-1]+1 else: dp[i][j] = max(dp[i-1][j], dp[i][j-1]) return dp[m][n] ```	The second function also has a bug. In the line `dp[i][j] = max(dp[i-1][j], dp[i][j-1])`, the `dp[i-1][j]` and `dp[i][j-1]` elements are not guaranteed to exist, since the DP table is initialized with `None` values for all elements outside the main diagonal. When the function tries to access these non-existent elements, it will raise a `TypeError`. To fix the bug, you can change the line to `dp[i…	The function you provided is also correct, but there is a small issue with the way the `dp` table is initialized. In the inner loop where `dp` is being filled, the line `dp[i][j] = dp[i-1][j-1]+1` assumes that `dp[i-1][j-1]` has already been initialized. However, since `dp` is initialized with `None` values, this line will raise a `TypeError` when it tries to access the `dp[i-1][j-1]` value. To f…	Yes, this function is also correct. It uses the same dynamic programming approach as the previous function, but it uses a slightly different way of filling the `dp` table. In this function, the `dp` table is filled in a bottom-up manner, starting from the bottom-left corner and moving up and to the right. At each step, the value of `dp[i][j]` is set to the maximum of the three possible values: * …
131	***	***	***	***
132	Write a function to find the highest common ancestor (not LCA) of two nodes in a binary tree.	Sure! Here's a function in JavaScript that finds the highest common ancestor of two nodes in a binary tree: function highestCommonAncestor(node1, node2) { if (node1 === null || node2 === null) { return null; } const ancestors1 = ancestors(node1); const ancestors2 = ancestors(node2); const intersection = ancestors1.filter(ancestor => ancestors2.includes(ancestor)); return intersection[intersection…	Sure! Here's a function in JavaScript that finds the highest common ancestor of two nodes in a binary tree: function highestCommonAncestor(node1, node2) { const ancestors1 = ancestors(node1); const ancestors2 = ancestors(node2); // Find the intersection of the two sets of ancestors const commonAncestors = ancestors1.filter(ancestor => ancestors2.includes(ancestor)); // Return the highest common a…	Here is a possible implementation of a function to find the highest common ancestor of two nodes in a binary tree: ``` def highest_common_ancestor(node1, node2): # Base case: If either node is None, return None if node1 is None or node2 is None: return None # If the two nodes are the same, return the node if node1 == node2: return node1 # Otherwise, find the highest common ancestor by recursively…
133	What if it is not a binary tree?	The function I provided assumes that the tree is a binary tree, where each node has at most two children (a left child and a right child). If the tree can have more than two children, the function will need to be modified accordingly. One way to find the highest common ancestor in a tree with more than two children is to use a depth-first search (DFS) approach. Here's an example of how the functi…	The function I provided assumes that the tree is a binary tree, where each node has at most two children (a left child and a right child). If the tree can have more than two children, the function will need to be modified accordingly. Here's an example of how the function could be modified to work for a tree with an arbitrary number of children: function highestCommonAncestor(node1, node2) { cons…	The `highest_common_ancestor` function I provided assumes that the tree is a binary tree, where each node has at most two children (a left child and a right child). If the tree is not a binary tree, the function may not work correctly. In general, the concept of a highest common ancestor can be applied to any tree, not just binary trees. However, the implementation of the function would need to b…
134	***	***	***	***
135	Implement a function to find the median of two sorted arrays of different sizes with O(1) space complexity and O(n) time complexity.	To find the median of two sorted arrays of different sizes with O(1) space complexity and O(n) time complexity, you can use the following approach: 1. Take the smaller array and find its median element. This can be done in O(n) time complexity by iterating through the array and selecting the middle element. 2. If the larger array is empty, return the median element of the smaller array. 3. If the…	Sure! Here's a possible solution: Let's say we have two sorted arrays, A and B, with sizes m and n, respectively. Our goal is to find the median of the concatenated array. 1. Concatenate the two arrays: A + B. 2. If m + n is odd, the median is the middle element of the concatenated array. 3. If m + n is even, the median is the average of the two middle elements of the concatenated array. Here's a…	Here's a possible implementation of a function to find the median of two sorted arrays of different sizes with O(1) space complexity and O(n) time complexity: ``` def median(a, b): # handle the case where one array is empty if not a or not b: return None # find the total number of elements n = len(a) + len(b) # find the index of the median element median_index = (n - 1) // 2 # handle the case whe…
136	Does there exist an implementation with better time complexity?	Yes, it's possible to implement a solution with better time complexity than O(n) for finding the median of two sorted arrays of different sizes. One approach is to use a divide-and-conquer strategy, which can reduce the time complexity to O(log n) in the worst case. The basic idea is to recursively partition the two arrays into smaller subarrays, and then find the median of the subarrays. Here's …	Yes, there are implementations with better time complexity. Here's one example: We can use a divide-and-conquer approach to find the median of two sorted arrays. The basic idea is to recursively partition the two arrays into smaller subarrays until we have a subarray with only one element, which is the median. Here's a sample implementation in Python: ```python def find_median(a, b): # Base case:…	Yes, there are implementations of the median finding problem with better time complexity than O(n). One such implementation is the "median finding" algorithm, which has a time complexity of O(n log n) in the worst case. This algorithm works by first finding the pivot element, which is the middle element of the array, and then partitioning the array into two subarrays, one containing elements less…
137	***	***	***	***
138	Write a function to find the majority element in a given integer array using the Boyer-Moore Voting Algorithm.	Sure! Here's a function in JavaScript that implements the Boyer-Moore Voting Algorithm to find the majority element in a given integer array: function majorityElement(arr) { let majority = null; let count = 0; for (let i = 0; i < arr.length; i++) { if (count === 0) { majority = arr[i]; count++; } else if (arr[i] === majority) { count++; } else { count--; } } return majority; } Here's a brief expl…	Sure! Here's an example function in JavaScript that implements the Boyer-Moore Voting Algorithm to find the majority element in a given integer array: function majorityElement(arr) { let majority = null; let count = 0; for (let i = 0; i < arr.length; i++) { if (count === 0) { majority = arr[i]; count++; } else if (arr[i] === majority) { count++; } else { count--; } } return majority; } Here's a b…	Sure! Here's an example function in JavaScript that implements the Boyer-Moore Voting Algorithm to find the majority element in a given integer array: ``` function majorityElement(arr) { let majority = null; let count = 0; for (let i = 0; i < arr.length; i++) { if (count === 0) { majority = arr[i]; count++; } else if (arr[i] === majority) { count++; } else { count--; } } return majority; } ``` He…
139	How about finding the top-2 most occurring elements?	Sure, we can modify the Boyer-Moore Voting Algorithm to find the top-2 most occurring elements in a given integer array. Here's an updated function in JavaScript: function topTwoElements(arr) { let element1 = null; let count1 = 0; let element2 = null; let count2 = 0; for (let i = 0; i < arr.length; i++) { if (count1 === 0) { element1 = arr[i]; count1++; } else if (arr[i] === element1) { count1++;…	Sure, we can modify the function to find the top-2 most occurring elements by using a data structure like a hash table to keep track of the element frequencies. Here's an example implementation: function topTwoElements(arr) { const freqs = {}; for (let i = 0; i < arr.length; i++) { const element = arr[i]; if (!freqs[element]) { freqs[element] = 1; } else { freqs[element]++; } } const maxFreq = Ma…	To find the top-2 most occurring elements in an array of integers, we can modify the Boyer-Moore Voting Algorithm to keep track of the two most frequent elements and their counts. Here's an example function in JavaScript that implements this algorithm: ``` function top2Elements(arr) { let element1 = null; let count1 = 0; let element2 = null; let count2 = 0; for (let i = 0; i < arr.length; i++) { …
140	***	***	***	***
141	A binary tree is full if all of its vertices have either zero or two children. Let B_n denote the number of full binary trees with n vertices. Implement a function to find B_n.	Sure, I can help you with that! To find B_n, we can use a recursive formula. A full binary tree with n vertices must have n-1 internal vertices and n-1 leaf vertices. Each internal vertex has two children, and each leaf vertex has zero children. Let T(n) be the number of full binary trees with n vertices. Then, we can write the following recursive formula: T(n) = T(n-1) \* 2^(n-1) The base case i…	Sure, I can help you with that! To find the number of full binary trees with n vertices, we can use a recursive formula. The idea is that each vertex in the tree can either have zero children (a leaf node) or two children (a non-leaf node). Let B_n be the number of full binary trees with n vertices. We can define a recursive formula as follows: B_n = B_{n-1} + B_{n-2} This formula states that the…	Here's a recursive approach to find the number of full binary trees with n vertices: ``` def full_binary_trees(n): if n == 0: return 1 if n == 1: return 1 if n == 2: return 2 else: return full_binary_trees(n-1) * (2**(n-1) - 1) ``` The idea behind this function is to count the number of full binary trees by recursively dividing the problem into smaller sub-problems. The base case is when n = 0, w…
142	What if the problem changed from a binary tree to a ternary tree?	Sure, let's consider a ternary tree, where each vertex can have up to three children. We can modify the recursive formula to calculate the number of full ternary trees with n vertices. A full ternary tree with n vertices must have n-1 internal vertices and n-1 leaf vertices. Each internal vertex has up to three children, and each leaf vertex has zero children. Let T(n) be the number of full terna…	Sure, let's consider a ternary tree, where each node can have either zero, one, or two children. We can modify the recursive formula to count the number of full ternary trees with n vertices. The idea is similar to the binary tree case. Each vertex in the tree can either have zero children (a leaf node), one child (a non-leaf node with one child), or two children (a non-leaf node with two childre…	If the problem changed from a binary tree to a ternary tree, the recursive formula would need to be adjusted accordingly. A ternary tree is a tree where each vertex has at most three children (a left child, a right child, and a middle child). To count the number of full ternary trees with n vertices, we can use the following recursive formula: ``` T(n) = T(n-1) * 3^n ``` Here, T(n) represents the…
143	***	***	***	***
144	You are given two sorted lists of size m and n. Implement a function to find the kth smallest element in the union of the two lists with linear complexity.	Sure! Here's a possible solution: Let's assume the two sorted lists are A and B, and their sizes are m and n, respectively. We can create a new list C that contains all the elements from both lists. Since the lists are sorted, we can simply concatenate them: C = A + B Now, we need to find the kth smallest element in C. One way to do this is to use a linear scan algorithm. We can iterate through t…	Sure! Here's a possible solution: Let's assume the two sorted lists are A and B, and their sizes are m and n, respectively. We can create a new list C that contains all the elements from both A and B, sorted in ascending order. To do this, we can use a technique called "merge" or "merge sort". The basic idea is to compare elements from both lists and place them in the correct order in a new list.…	The function you are describing is called the "k-th smallest element" problem. There are several algorithms that can solve this problem with linear complexity, meaning that the time complexity is O(n) or O(m) in the worst case. One such algorithm is the "select" algorithm, which works as follows: 1. If k is less than or equal to the smaller of m and n, return the kth element of the smaller list. …
145	Does there exist an algorithm with better time complexity? If so, implement it.	Yes, there are algorithms with better time complexity than the linear scan algorithm we discussed earlier. One such algorithm is the merge sort algorithm, which has a time complexity of O(n log n) in the worst case. Here's a possible implementation of the merge sort algorithm: function merge_sort(A): # Base case: If the list has only one element, return it if len(A) <= 1: return A # Split the lis…	Yes, there are algorithms with better time complexity than O(m + n) for finding the kth smallest element in the union of two sorted lists. One such algorithm is the "selection algorithm" with a time complexity of O(k) [1]. The basic idea is to select the kth smallest element from the combined list of A and B, without sorting the entire list. Here's a high-level description of the algorithm: 1. In…	Yes, there are algorithms with better time complexity than the "select" algorithm. One such algorithm is the "binary search" algorithm, which has a time complexity of O(log n) in the worst case. The "binary search" algorithm works by dividing the list of elements into two halves, and then repeating this process until the desired element is found. The basic idea is to find the middle element of th…
146	***	***	***	***
147	Implement a program to find the common elements in two arrays without using any extra data structures.	Sure! Here's an example program in JavaScript that finds the common elements in two arrays without using any extra data structures: ``` function findCommonElements(arr1, arr2) { const result = []; for (let i = 0; i < arr1.length; i++) { if (arr2.includes(arr1[i])) { result.push(arr1[i]); } } return result; } ``` This program uses the `includes()` method to check if an element in `arr1` exists in …	Sure! Here's an example program that finds the common elements in two arrays without using any extra data structures: ``` function findCommonElements(arr1, arr2) { const set1 = new Set(arr1); const set2 = new Set(arr2); const commonElements = []; for (let element of set1) { if (set2.has(element)) { commonElements.push(element); } } return commonElements; } ``` This program uses the `Set` data str…	Here's an example program in JavaScript that finds the common elements in two arrays without using any extra data structures: ``` function findCommonElements(arr1, arr2) { let commonElements = []; for (let i = 0; i < arr1.length; i++) { if (arr2.includes(arr1[i])) { commonElements.push(arr1[i]); } } return commonElements; } ``` This program uses the `includes()` method to check if each element in…
148	Now the constraint of not using extra data structure is removed, implement one with the best time complexity.	Sure! Here's an example program in JavaScript that finds the common elements in two arrays using a hash table, which has a time complexity of O(n): ``` function findCommonElements(arr1, arr2) { const hashTable = new Map(); for (let i = 0; i < arr1.length; i++) { hashTable.set(arr1[i], true); } const result = []; for (let i = 0; i < arr2.length; i++) { if (hashTable.has(arr2[i])) { result.push(arr…	Sure! Here's an example program that finds the common elements in two arrays with the best time complexity, O(n), using a hash table: ``` function findCommonElements(arr1, arr2) { const hashTable = new Map(); for (let element of arr1) { hashTable.set(element, true); } const commonElements = []; for (let element of arr2) { if (hashTable.has(element)) { commonElements.push(element); } } return comm…	Without the constraint of not using extra data structures, we can use a hash table to efficiently find the common elements between two arrays. Here's an example implementation in JavaScript: ``` function findCommonElements(arr1, arr2) { const hash = new Map(); for (let i = 0; i < arr1.length; i++) { hash.set(arr1[i], true); } const commonElements = []; for (let i = 0; i < arr2.length; i++) { if (…
149	***	***	***	***
150	Evaluate the following movie reviews on a scale of 1 to 5, with 1 being very negative, 3 being neutral, and 5 being very positive: 1. This movie released on Nov. 18, 2019, was phenomenal. The cinematography, the acting, the plot - everything was top-notch. 2. Never before have I been so disappointed with a movie. The plot was predictable and the characters were one-dimensional. In my opinion, thi…	Sure! Here are the evaluations of the movie reviews on a scale of 1 to 5: [5, 1, 3] The first review praises the movie's cinematography, acting, and plot, calling it "phenomenal." Therefore, it gets a rating of 5, indicating a very positive review. The second review expresses extreme disappointment with the movie, calling it the "worst one" released in 2022. It criticizes the plot for being predi…	Sure, here are the evaluations of the movie reviews on a scale of 1 to 5: [5, 1, 3] The first review is very positive, praising the movie's cinematography, acting, and plot. Therefore, it gets a rating of 5. The second review is very negative, calling the movie the worst one released in 2022 with a predictable plot and one-dimensional characters. Therefore, it gets a rating of 1. The third review…	Sure! Here are the movie reviews evaluated on a scale of 1 to 5: [5, 1, 3] The first movie review is very positive, praising the cinematography, acting, and plot, so it gets a score of 5. The second movie review is very negative, calling the plot predictable and the characters one-dimensional, and stating that it's the worst movie released in 2022, so it gets a score of 1. The third movie review …
151	Update your previous reply by including the release date as part of the JSON content.	Sure, here's an updated version of the JSON array with the release dates included: [ { "rating": 5, "release_date": "Nov. 18, 2019" }, { "rating": 1, "release_date": "2022" }, { "rating": 3, "release_date": "Feb. 2018" } ] I've included the release dates you provided in the JSON objects for each movie review.	Sure, here's an updated version of the JSON array with the release date included for each movie: [ { "rating": 5, "release_date": "November 18, 2019" }, { "rating": 1, "release_date": "2022" }, { "rating": 3, "release_date": "February 2018" } ] I hope this helps! Let me know if you have any further questions.	Sure, here's an updated version of the JSON array with the release date included for each movie review: [ { "review": "This movie released on Nov. 18, 2019, was phenomenal. The cinematography, the acting, the plot - everything was top-notch.", "score": 5, "release_date": "November 18, 2019" }, { "review": "Never before have I been so disappointed with a movie. The plot was predictable and the cha…	4bit messes up by adding the textual review as well which was not asked
152	***	***	***	***
153	Given these categories - Literature, History, Science, and Art. Please analyze the following questions and assign them to one of these categories. In your response, refrain from uttering any extraneous words. List only one topic per sentence, strictly adhering to the line-by-line format. 1. Discuss the main themes and stylistic techniques employed by Leo Tolstoy in 'War and Peace.' How do they al…	1. Literature 2. History 3. Science 4. Art	1. Literature 2. History 3. Science 4. Art	Sure, here are the topics assigned to each category: 1. Literature: * Discuss the main themes and stylistic techniques employed by Leo Tolstoy in 'War and Peace.' 2. History: * Analyze the geopolitical strategies and domestic policies adopted by the US President during World War II. 3. Science: * Draw the Lewis structure for water and explain the nature of its polarity. 4. Art: * Critically exami…	4 bit starts blabbering despite the instructions ("In your response, refrain from uttering any extraneous words")
154	Amend your earlier answer by mentioning a person who is most relevant to each point.	Sure, here are the revised answers with a person mentioned for each point: 1. Literature - Leo Tolstoy 2. History - Franklin D. Roosevelt 3. Science - Linus Pauling 4. Art - Leonardo da Vinci	Sure, here are the revised answers with a person who is most relevant to each point: 1. Literature - Leo Tolstoy 2. History - Franklin D. Roosevelt 3. Science - Linus Pauling 4. Art - Leonardo da Vinci	Sure, here are the topics assigned to each category, along with a person who is most relevant to each point: 1. Literature: * Discuss the main themes and stylistic techniques employed by Leo Tolstoy in 'War and Peace.' (Leo Tolstoy) 2. History: * Analyze the geopolitical strategies and domestic policies adopted by the US President during World War II. (Franklin D. Roosevelt) 3. Science: * Draw th…
155	***	***	***	***
156	Extract the following information from the presented texts: The name of the book, the author, the main character, the year of publication. Output in the format of "main character, book, author, year of publication", one book per line. a) In the realm of wizarding literature, a true standout is the work of J.K. Rowling. One of her books that left an indelible mark is 'Harry Potter and the Philosop…	Sure! Here's the information you requested: * Harry Potter, Harry Potter and the Philosopher's Stone, J.K. Rowling, 1997 * Frodo Baggins, The Lord of the Rings: The Fellowship of the Ring, J.R.R. Tolkien, 1954 * Zylo, The Prism Galaxy Chronicles: The Awakening of the Starcaster, L.E. Starlighter, 2028	Sure! Here's the information you requested: * Harry Potter, Harry Potter and the Philosopher's Stone, J.K. Rowling, 1997 * Frodo Baggins, The Lord of the Rings: The Fellowship of the Ring, J.R.R. Tolkien, 1954 * Zylo, The Prism Galaxy Chronicles: The Awakening of the Starcaster, L.E. Starlighter, 2028	Sure! Here's the information you requested, formatted as "main character, book, author, year of publication": Harry Potter, Harry Potter and the Philosopher's Stone, J.K. Rowling, 1997 Frodo Baggins, The Lord of the Rings: The Fellowship of the Ring, J.R.R. Tolkien, 1954 Zylo, The Prism Galaxy Chronicles: The Awakening of the Starcaster, L.E. Starlighter, 2028
157	Reformulate your earlier reply, output it in JSON format and only include books published after 1980.	Sure, here's the reformulated information in JSON format, including only books published after 1980: [ { "mainCharacter": "Harry Potter", "book": "Harry Potter and the Philosopher's Stone", "author": "J.K. Rowling", "yearOfPublication": 1997 }, { "mainCharacter": "Zylo", "book": "The Prism Galaxy Chronicles: The Awakening of the Starcaster", "author": "L.E. Starlighter", "yearOfPublication": 2028…	Sure, here's the reformulated information in JSON format, including only books published after 1980: [ { "main character": "Harry Potter", "book": "Harry Potter and the Philosopher's Stone", "author": "J.K. Rowling", "year of publication": 1997 }, { "main character": "Zylo", "book": "The Prism Galaxy Chronicles: The Awakening of the Starcaster", "author": "L.E. Starlighter", "year of publication"…	Sure, here's the reformulated reply in JSON format, including only books published after 1980: [ { "mainCharacter": "Frodo Baggins", "book": "The Lord of the Rings: The Fellowship of the Ring", "author": "J.R.R. Tolkien", "yearPublished": 1954 }, { "mainCharacter": "Zylo", "book": "The Prism Galaxy Chronicles: The Awakening of the Starcaster", "author": "L.E. Starlighter", "yearPublished": 2028 }…	4bit messes up by including books from 1954 but not 1997 harry potter
158	***	***	***	***
159	Given the following data, identify the company with the highest profit in 2021 and provide its CEO's name: a) Company X, with CEO Amy Williams, reported $30 billion in revenue and a $3 billion profit in 2021. b) Company Y, led by CEO Mark Thompson, posted a $60 billion revenue and a $6 billion profit in the same year. c) Company Z, under CEO Sarah Johnson, announced a $20 billion revenue and a $7…	Based on the given data, the company with the highest profit in 2021 is Company W, managed by CEO James Smith, with a profit of $21 billion.	Based on the given data, the company with the highest profit in 2021 is Company W, with a profit of $21 billion. The CEO of Company W is James Smith.	The company with the highest profit in 2021 is Company W, with a profit of $21 billion. The CEO of Company W is James Smith. Here's a summary of the data: * Company X: $30 billion revenue, $3 billion profit * Company Y: $60 billion revenue, $6 billion profit * Company Z: $20 billion revenue, $7 billion profit * Company W: $300 billion revenue, $21 billion profit * Company V: $200 billion revenue,…
160	Which company had the highest profit margin (profit/revenue ratio))?	Based on the given data, the company with the highest profit margin (profit/revenue ratio) is Company Z, under CEO Sarah Johnson, with a profit margin of 35% ($7 billion profit / $20 billion revenue).	Based on the given data, the company with the highest profit margin is Company Z, with a profit margin of 35% (7 billion profit / 20 billion revenue). The CEO of Company Z is Sarah Johnson.	To calculate the profit margin (profit/revenue ratio), we need to divide the profit by the revenue for each company. Here are the calculations: * Company X: $3 billion profit / $30 billion revenue = 0.1 (or 10%) * Company Y: $6 billion profit / $60 billion revenue = 0.1 (or 10%) * Company Z: $7 billion profit / $20 billion revenue = 0.35 (or 35%) * Company W: $21 billion profit / $300 billion rev…
161	***	***	***	***
162	Identify the countries, their capitals, and the languages spoken in the following sentences. Output in JSON format. a) Amidst the idyllic vistas, Copenhagen, Denmark's capital, captivates visitors with its thriving art scene and the enchanting Danish language spoken by its inhabitants. b) Within the enchanting realm of Eldoria, one discovers Avalore, a grandiose city that emanates an ethereal aur…	Here are the countries, capitals, and languages spoken in the given sentences in JSON format: [ { "country": "Denmark", "capital": "Copenhagen", "language": "Danish" }, { "country": "Eldoria", "capital": "Avalore", "language": "Lumina" }, { "country": "Argentina", "capital": "Buenos Aires", "language": "Spanish" } ] I hope this helps! Let me know if you have any further questions.	Here are the countries, capitals, and languages spoken in the given sentences in JSON format: [ { "country": "Denmark", "capital": "Copenhagen", "language": "Danish" }, { "country": "Eldoria", "capital": "Avalore", "language": "Lumina" }, { "country": "Argentina", "capital": "Buenos Aires", "language": "Spanish" } ] I hope this helps! Let me know if you have any further questions.	{ "sentences": [ { "country": "Denmark", "capital": "Copenhagen", "language": "Danish" }, { "country": "Eldoria", "capital": "Avalore", "language": "Lumina" }, { "country": "Argentina", "capital": "Buenos Aires", "language": "Spanish" } ] }
163	Come up with 3 similar examples in the YAML format.	Sure, here are three similar examples in YAML format: 1. country: France capital: Paris language: French 2. country: Brazil capital: BrasÃ­lia language: Portuguese 3. country: Japan capital: Tokyo language: Japanese I hope this helps! Let me know if you have any further questions.	Sure, here are three examples in YAML format: 1. country: France capital: Paris language: French 2. country: Brazil capital: BrasÃ­lia language: Portuguese 3. country: Japan capital: Tokyo language: Japanese I hope this helps! Let me know if you have any further questions.	Sure, here are three examples in YAML format: 1. --- country: Japan capital: Tokyo language: Japanese 2. --- country: France capital: Paris language: French 3. --- country: Brazil capital: BrasÃ­lia language: Portuguese
164	***	***	***	***
165	Please read the paragraph below and count how many times the words "Amazon", "river", and "you" appear. Please present the results in the format of "word, number of appearances" with each word on a separate line. Sort the lines in order of the number of appearances. The Amazon, a mesmerizing expanse of nature's wonders, is home to the legendary Amazon River. Flowing through awe-inspiring landscap…	Sure! Here are the results you requested: Amazon, 8 river, 5 you, 2 Here they are in order of the number of appearances: 1. Amazon, 8 2. river, 5 3. you, 2	Sure! Here are the results you requested: Amazon, 8 river, 5 you, 2 The words appear in the following order, from most frequent to least frequent: Amazon, river, you	Sure! Here are the results of the word count: Amazon, 7 river, 4 you, 2 So, the word "Amazon" appears 7 times, the word "river" appears 4 times, and the word "you" appears 2 times.
166	Please repeat the same task using the words 'the', 'and', and 'to'	Sure! Here are the results: 1. the, 10 2. and, 5 3. to, 4	Sure! Here are the results: the, 7 and, 4 to, 3 The words appear in the following order, from most frequent to least frequent: the, and, to	Sure, here's the count for the words 'the', 'and', and 'to' in the given paragraph: The: 4 And: 3 To: 2 So, the word 'the' appears 4 times, the word 'and' appears 3 times, and the word 'to' appears 2 times in the paragraph.
167	***	***	***	***
168	Identify the named entities (people, organizations, locations) mentioned in the given news article. Please generate a JSON dictionary that lists the named entities in three separate groups based on their entity types. The key is the type of entity and the value is a list of strings. Yesterday, Adamson Emerson, the CEO of Faraday, and Dieter Zetsche, the CEO of Daimler AG, announced plans to build…	Here is a JSON dictionary with the named entities grouped by entity type: { "People": ["Adamson Emerson", "Dieter Zetsche", "Herbert Diess"], "Organizations": ["Faraday", "Daimler AG", "Volkswagen"], "Locations": ["Berlin", "Europe"] } The named entities in the news article are: * People: Adamson Emerson, Dieter Zetsche, and Herbert Diess. * Organizations: Faraday, Daimler AG, and Volkswagen. * L…	Here is a JSON dictionary with the named entities grouped by entity type: "People": [ "Adamson Emerson", "Dieter Zetsche", "Herbert Diess" ], "Organizations": [ "Faraday", "Daimler AG", "Volkswagen" ], "Locations": [ "Berlin", "Europe" ] Note: In this response, the named entities are grouped into three categories: People, Organizations, and Locations. The key represents the entity type, and the v…	Here is a JSON dictionary that lists the named entities in the news article, grouped by entity type: { "people": ["Adamson Emerson", "Dieter Zetsche", "Herbert Diess"], "organizations": ["Faraday", "Daimler AG", "Volkswagen"], "locations": ["Berlin", "Europe"] } Explanation: * "people" includes the names of individuals mentioned in the article, including Adamson Emerson, Dieter Zetsche, and Herbe…
169	Now make the JSON object shorter by replacing each value with its first letter. Please output everything in a single line without using indentation or creating new lines.	Sure, here's the shortened JSON object: {"P":["A", "D", "H"], "O":["F", "D", "V"], "L":["B", "E"]} The shortened JSON object uses the first letter of each value to represent the named entities: * People: "A" for Adamson Emerson, "D" for Dieter Zetsche, and "H" for Herbert Diess. * Organizations: "F" for Faraday, "D" for Daimler AG, and "V" for Volkswagen. * Locations: "B" for Berlin and "E" for E…	Sure, here's the shortened JSON object: {"P":["A.E","D.Z","H.D"],"O":["F","D.A.G","V"],"L":["B","E"]} In this version, each value is represented by its first letter, and all keys and values are listed on a single line without indentation or line breaks.	{p:A, p:D, p:H, o:F, o:D, o:V, l:B, l:E}	both 8 and 4bit versions messes up
170	***	***	***	***
171	Analyze the following customer reviews from different sources for three different smartphones - the latest iPhone, Samsung Galaxy, and Google Pixel - and provide an overall rating for each phone on a scale of 1 to 10. Consider the following complex and contradictory reviews: - TechRadar's review of the latest iPhone: The new iPhone is a stunning triumph of engineering that sets a new bar for smar…	Sure, here are the overall ratings for each phone based on the customer reviews you provided: { "iPhone": 8.5, "Samsung Galaxy": 8.2, "Google Pixel": 8.0 } The ratings are based on the following factors: * iPhone: The review highlights the phone's engineering, performance, and camera quality, but also mentions the lack of a 'wow' factor and high price. Therefore, the rating is 8.5 out of 10. * Sa…	Sure, here are the overall ratings for each phone based on the customer reviews you provided: { "iPhone": 8.5, "Samsung Galaxy": 8.2, "Google Pixel": 7.9 } Here's a breakdown of how I arrived at these ratings: * iPhone: The TechRadar review praises the iPhone's engineering, performance, and camera quality, but notes that the design is incremental and the price is high. Overall, the review suggest…	Sure, here are the overall ratings for each phone based on the customer reviews: { "iPhone": 8.5, "Samsung Galaxy": 8.2, "Google Pixel": 8.0 } Here's a breakdown of how I calculated the ratings: * iPhone: TechRadar's review praises the phone's engineering, performance, and camera quality, but notes that the design is incremental and the price is high. I gave the iPhone a rating of 8.5, deducting …
172	Can you change the ratings from numbers to letters? Capital letters MUST be used when writing the names of phones.	Sure! Here are the overall ratings for each phone based on the customer reviews you provided, using letters instead of numbers: { "iPhone": "A", "Samsung Galaxy": "B+", "Google Pixel": "B" } I hope this helps! Let me know if you have any further questions.	Sure! Here are the overall ratings for each phone based on the customer reviews you provided, using letters instead of numbers: * iPhone: A * Samsung Galaxy: B * Google Pixel: C I hope this helps! Let me know if you have any other questions.	Sure, here are the ratings for each phone using letters instead of numbers: { "iPhone": "A", "Samsung Galaxy": "B", "Google Pixel": "B+" } I hope this helps! Let me know if you have any other questions.	4bit messes up, how can 8.2 be B but 8.0 be B+ ??
173	***	***	***	***
174	Given a set of complex equations, extract all unique variable names from each equation. Return the results as a JSON string, with one line allocated for each equation. ``` 1) y = (3/4)x^3 - e^(2x) + sin(pi*x) - sqrt(7) 2) 2A - B/(3+C) * sum(N=1 to 5; ln(N)^2) = 5D*integral(a=0 to pi; cos(comb(N=1 to 10; N*a))) 3) E = m(c^2) + gamma*(v/d)/(-(alpha/2) + sqrt(beta^2 + (alpha/2)^2)) ```	Here's the JSON string you requested, containing the unique variable names for each equation: ``` [ { "equation": "y = (3/4)x^3 - e^(2x) + sin(pi*x) - sqrt(7)", "variables": ["x", "y"] }, { "equation": "2A - B/(3+C) * sum(N=1 to 5; ln(N)^2) = 5D*integral(a=0 to pi; cos(comb(N=1 to 10; N*a)))", "variables": ["A", "B", "C", "D", "N", "a"] }, { "equation": "E = m(c^2) + gamma*(v/d)/(-(alpha/2) + sqr…	Sure, here are the unique variable names for each equation: 1. y, x, e, pi, sqrt(7) 2. A, B, C, D, N, ln(N), a, pi 3. E, m, c, gamma, v, d, alpha, beta Here's the JSON string with one line for each equation: [ "y", "x", "e", "pi", "sqrt(7)" ] [ "A", "B", "C", "D", "N", "ln(N)", "a", "pi" ] [ "E", "m", "c", "gamma", "v", "d", "alpha", "beta" ] I hope this helps! Let me know if you have any further…	Here's the JSON string with the unique variable names for each equation: ``` [ { "equation": "y = (3/4)x^3 - e^(2x) + sin(pi*x) - sqrt(7)", "variables": ["x", "y"] }, { "equation": "2A - B/(3+C) * sum(N=1 to 5; ln(N)^2) = 5D*integral(a=0 to pi; cos(comb(N=1 to 10; N*a)))", "variables": ["A", "B", "C", "D", "N", "a", "pi"] }, { "equation": "E = m(c^2) + gamma*(v/d)/(-(alpha/2) + sqrt(beta^2 + (alp…	8bit thinks a lot of the constants are variables, 4bit thinks pi is a variable in the second equation. 16bit is correct.
175	Please rearrange the equations and use 'a', 'b', 'c', 'd', etc. as variables.	Sure! Here are the equations with the variables renamed: ``` [ { "equation": "y = (3/4)a^3 - e^(2a) + sin(pi*a) - sqrt(7)", "variables": ["a", "y"] }, { "equation": "2b - c/(3+d) * sum(n=1 to 5; ln(n)^2) = 5d*integral(a=0 to pi; cos(comb(n=1 to 10; n*a)))", "variables": ["b", "c", "d", "n", "a"] }, { "equation": "e = m(c^2) + gamma*(v/d)/(-(alpha/2) + sqrt(beta^2 + (alpha/2)^2))", "variables": ["…	Sure, here are the equations with the variables renamed: 1. y = (3/4)a^3 - e^(2a) + sin(pi*a) - sqrt(7) 2. 2b - (3+c)*sum(N=1 to 5; ln(N)^2) = 5d*integral(a=0 to pi; cos(comb(N=1 to 10; N*a))) 3. E = m(c^2) + gamma*(v/d)/(-(alpha/2) + sqrt(beta^2 + (alpha/2)^2)) Here are the unique variable names for each equation: 1. y, a, e, pi, sqrt(7) 2. b, c, d, N, ln(N), a, pi 3. E, m, c, gamma, v, d, alpha…	Sure, here are the equations with the variables renamed: 1. a = (3/4)b^3 - e^(2b) + sin(pi*b) - sqrt(7) 2. c - (3+d)*ln(d)^2 = 5e*integral(a=0 to pi; cos(comb(a, b))) 3. f = m(g^2) + h*(v/d)/(-(f/2) + sqrt(g^2 + (f/2)^2)) where a, b, c, d, e, f, g, h, v are variables.
176	***	***	***	***
177	Given the following records of stock prices, extract the highest and lowest closing prices for each month in the year 2022. Return the results as a CSV string, with one line allocated for each month. Date,Open,High,Low,Close,Volume 2022-01-01,150.02,155.28,148.50,153.80,15678900 2022-01-02,154.32,157.25,153.48,156.25,19874500 2022-02-01,160.50,163.28,159.50,161.80,14326700 2022-02-02,161.80,164.2…	Sure, here are the highest and lowest closing prices for each month in 2022, returned as a CSV string: "2022-01-01,155.28,148.50 2022-02-01,163.28,159.50 2022-03-01,168.35,163.10" I hope this helps! Let me know if you have any further questions.	Sure, here are the highest and lowest closing prices for each month in 2022, as requested: "Date,Highest Closing Price,Lowest Closing Price 2022-01-01,155.28,148.50 2022-02-01,163.28,159.50 2022-03-01,168.35,163.10" I hope this helps! Let me know if you have any further questions.	Sure! Here are the highest and lowest closing prices for each month in 2022, returned as a CSV string: "2022-01-01,155.28,148.50 2022-02-01,163.28,159.50 2022-03-01,168.35,163.10" Here's a breakdown of the data: * 2022-01-01: The highest closing price was 155.28, and the lowest closing price was 148.50. * 2022-02-01: The highest closing price was 163.28, and the lowest closing price was 159.50. *…
178	Do the same task again with the JSON format and round all numbers in your response to the nearest integers.	Sure, here are the highest and lowest closing prices for each month in 2022, returned as a JSON object with rounded integers: { "2022-01-01": [155, 149], "2022-02-01": [163, 160], "2022-03-01": [169, 163] } I hope this helps! Let me know if you have any further questions.	Sure, here are the highest and lowest closing prices for each month in 2022, as requested: { "2022-01-01": [155, 149], "2022-02-01": [163, 160], "2022-03-01": [169, 163] } I hope this helps! Let me know if you have any further questions.	Sure, here are the highest and lowest closing prices for each month in 2022, rounded to the nearest integer, in JSON format: { "2022-01-01": { "high": 155, "low": 149 }, "2022-02-01": { "high": 163, "low": 160 }, "2022-03-01": { "high": 169, "low": 164 } } Here's a breakdown of the data: * 2022-01-01: The highest closing price was 155, and the lowest closing price was 149. * 2022-02-01: The highe…
179	***	***	***	***
180	In the field of quantum physics, what is superposition, and how does it relate to the phenomenon of quantum entanglement?	Superposition and entanglement are fundamental concepts in quantum physics. Superposition refers to the ability of a quantum system to exist in multiple states simultaneously. In classical physics, a system can only be in one definite state at a time. However, in quantum physics, a quantum system can exist in a superposition of states, meaning it has multiple properties or states simultaneously, …	Superposition and entanglement are fundamental concepts in quantum physics. Superposition refers to the ability of a quantum system to exist in multiple states simultaneously. In other words, a quantum particle can exist in more than one position or have more than one set of properties at the same time. This is a result of the wave-particle duality, where quantum objects can exhibit both wave-lik…	In quantum physics, superposition is a fundamental concept that describes the ability of a quantum system to exist in multiple states simultaneously. This means that a quantum particle, such as an electron or a photon, can occupy multiple positions or have multiple properties, such as spin or energy, at the same time. Superposition is a result of the wave-particle duality of quantum systems, wher…
181	What assumptions have you made in your response? Are they valid?	My response assumes that the question refers to the concept of superposition in quantum mechanics and the phenomenon of quantum entanglement. This assumption is valid since the question mentions "quantum physics" and "quantum entanglement." Another assumption is that the question asks for a brief explanation of the concepts, rather than a detailed mathematical derivation or experimental evidence.…	In my response, I have made several assumptions that are commonly accepted in the field of quantum physics. However, it's important to note that these assumptions are not necessarily valid for all possible interpretations of quantum mechanics. Here are some of the assumptions I've made: 1. Quantum objects can exist in a superposition of states: This assumption is based on the principles of quantu…	In my response, I have made several assumptions that may not be valid in all cases. Here are some of the assumptions I have made: 1. The quantum system is isolated from the environment: This assumption is not always valid, as quantum systems can interact with their environment and lose their quantum properties. 2. The quantum system is in a pure state: This assumption is not always valid, as quan…	8bit anad 4bit misunderstand the 'intention' of the question. 4bit bersion blabbers something random about quantum computing.
182	***	***	***	***
183	Consider a satellite that is in a circular orbit around the Earth. The speed of the satellite decreases. What will happen to the satellite's orbital radius and period of revolution? Please justify your answer using principles of physics.	If the speed of a satellite in a circular orbit around the Earth decreases, two things will happen: 1. The satellite's orbital radius will increase. 2. The satellite's period of revolution will increase. To understand why, let's consider the principles of physics that govern the behavior of satellites in orbit: 1. Conservation of Energy: The total energy of a satellite in orbit remains constant. …	If the speed of a satellite in a circular orbit around the Earth decreases, two things will happen: 1. The satellite's orbital radius will decrease. 2. The satellite's period of revolution will increase. Let's justify these statements using principles of physics: 1. Orbital radius: The satellite's orbital radius is determined by its velocity and the gravitational force acting upon it. As the sate…	If the speed of a satellite in a circular orbit around the Earth decreases, the satellite will move to a lower orbit with a smaller radius. This is because the satellite's kinetic energy, which is proportional to its speed, has decreased, and the satellite's potential energy, which is proportional to its distance from the center of the Earth, has increased. As a result, the satellite's total ener…	only the 16bit's answer is correct.
184	What are some corner cases or edge cases in your solution? How do you handle them?	In the solution I provided, there are a few corner cases or edge cases that should be considered: 1. Minimum speed requirement: For a satellite to remain in orbit, it must maintain a minimum speed known as the "orbital velocity." If the satellite's speed decreases below this threshold, it will not be able to maintain its orbit and will fall back towards the Earth. In this case, the solution I pro…	In the solution I provided, there are a few corner cases or edge cases that should be considered: 1. Minimum speed limit: If the speed of the satellite decreases to a point where it is no longer able to maintain a stable orbit, it will fall out of orbit and enter the Earth's atmosphere. In this case, the satellite's period of revolution would become undefined. 2. Atmospheric drag: If the satellit…	In my previous answer, I described a solution that uses a combination of a circular buffer and a priority queue to implement a rate-limited, first-in-first-out (FIFO) queue. Here are some corner cases or edge cases that need to be considered: 1. Buffer overflow: What happens if the buffer is full and there are still incoming requests? In this case, the buffer will start dropping requests, which m…	4bit has completely forgotten what it was talking about and starts blabbering about something completely nonsense. 16 and 8bit looks reasonable
185	***	***	***	***
186	Photosynthesis is a vital process for life on Earth. Could you outline the two main stages of photosynthesis, including where they take place within the chloroplast, and the primary inputs and outputs for each stage?	Of course! Photosynthesis is indeed a crucial process that supports life on Earth. It occurs in specialized organelles called chloroplasts, which are present in plant cells. The two main stages of photosynthesis are: 1. Light-Dependent Reactions (also known as the Hill Reaction): * Location: Stroma (the fluid-filled space within the chloroplast) * Inputs: Light energy, water (H2O), and carbon dio…	Of course! Photosynthesis is indeed a crucial process that supports life on Earth. It occurs in specialized organelles called chloroplasts, which are present in plant cells. The two main stages of photosynthesis are: 1. Light-dependent reactions (also known as the Hill reaction): * Location: Stroma (the fluid-filled space within the chloroplast) * Inputs: Light energy, water (H2O), and carbon dio…	Certainly! Photosynthesis is indeed a crucial process that supports life on Earth by converting light energy from the sun into chemical energy in the form of organic compounds, such as glucose. The process takes place in specialized organelles called chloroplasts, which are present in plant cells. The two main stages of photosynthesis are: 1. Light-dependent reactions (also known as the Hill reac…
187	How much energy can a tree produce through photosynthesis in its lifetime? Please provide an estimate using actual numerical values and thoroughly explain your thought process step-by-step.	Estimating the amount of energy a tree can produce through photosynthesis in its lifetime is a complex task, as it depends on various factors such as the tree species, age, location, and environmental conditions. However, we can make an educated estimate using some general assumptions and data. 1. Average tree size: Let's consider an average tree size of 10 meters (33 feet) tall and 1 meter (3 fe…	Estimating the amount of energy a tree can produce through photosynthesis in its lifetime is a complex task, as it depends on various factors such as the tree species, age, location, and environmental conditions. However, we can make an educated estimate using some general assumptions and data. 1. Average tree size and photosynthetic activity: Let's consider an average mature tree with a height o…	Estimating the amount of energy a tree can produce through photosynthesis in its lifetime is a complex task, as it depends on various factors such as the tree species, age, location, and environmental conditions. However, we can make an educated estimate using some general assumptions and data. 1. Average tree size and photosynthetic activity: Let's consider an average mature tree with a height o…
188	***	***	***	***
189	What is the central dogma of molecular biology? What processes are involved? Who named this?	The central dogma of molecular biology is the concept that genetic information flows from DNA to RNA to proteins, and it is the fundamental principle that explains how genetic information is transmitted and expressed within cells. This idea was first proposed by Francis Crick in 1958. The central dogma involves several processes: 1. Transcription: The process of creating a complementary RNA copy …	The central dogma of molecular biology is the concept that genetic information flows from DNA to RNA to proteins, and it is the fundamental principle that explains how genetic information is transmitted and expressed within cells. This concept was first described by Francis Crick in 1958. The central dogma involves several processes: 1. Transcription: The process by which the information in a gen…	The central dogma of molecular biology is the idea that genetic information flows from DNA to RNA to proteins, and that this flow of information is the fundamental mechanism by which cells process and transmit genetic information. The central dogma was first articulated by Francis Crick, one of the discoverers of the structure of DNA, in the 1950s. The central dogma is a conceptual framework that…	Interesting that 16bit gives 4 points, 8 bit reproduces the first 3 points and 4bit reproduces the first 2 point. Very cleanly demonstrates the gradual degradation.
190	Identify and fix one incorrect fact in your previous response.	My apologies for the mistake in my previous response. The incorrect fact is the statement that Francis Crick proposed the central dogma of molecular biology in 1958. While Francis Crick did play a significant role in the discovery of the structure of DNA, the concept of the central dogma was actually first proposed by James Watson and Francis Crick in their 1953 paper, "Molecular Structure of Nuc…	My apologies for the mistake in my previous response. The incorrect fact is the statement that Francis Crick described the central dogma of molecular biology in 1958. While Francis Crick did play a significant role in the discovery of the structure of DNA, the concept of the central dogma was actually first described by molecular biologist Sydney Brenner in 1974. Here's the corrected response: Th…	In my previous response, I stated that the central dogma of molecular biology was first articulated by Francis Crick in the 1950s. However, this is not entirely accurate. While Crick did play a significant role in the discovery of the structure of DNA and the central dogma, the concept itself was actually first proposed by another scientist named Linus Pauling. In 1951, Pauling published a paper …	4bit says something completely false. 8bit goes back on what it had said earlier and now says something which is false. The 16bit also goes back on it said earlier (which also looks to be correct) but says something which may not be entirely false because that cited paper does exist and maybe that could be the first paper to talk about this phenomenon
191	***	***	***	***
192	Describe the process and write out the balanced chemical equation for the reaction that occurs when solid calcium carbonate reacts with hydrochloric acid to form aqueous calcium chloride, carbon dioxide, and water. What type of reaction is this, and what observations might indicate that the reaction is taking place?	The reaction between solid calcium carbonate (CaCO3) and hydrochloric acid (HCl) is a neutralization reaction, which produces aqueous calcium chloride (CaCl2), carbon dioxide (CO2), and water (H2O). The balanced chemical equation for this reaction is: CaCO3 + 2HCl â†’ CaCl2 + CO2 + H2O The reaction occurs in two stages: 1. The first stage involves the reaction between calcium carbonate and hydroc…	The reaction between solid calcium carbonate (CaCO3) and hydrochloric acid (HCl) is a neutralization reaction, which produces aqueous calcium chloride (CaCl2), carbon dioxide (CO2), and water (H2O). The balanced chemical equation for this reaction is: CaCO3 + 2HCl â†’ CaCl2 + CO2 + H2O The reaction occurs in two stages: 1. The first stage involves the reaction of calcium carbonate with hydrochlor…	The reaction between solid calcium carbonate and hydrochloric acid is a neutralization reaction, which is a type of chemical reaction in which an acid and a base react to form a salt and water. The balanced chemical equation for this reaction is: CaCO3 (s) + 2HCl (aq) â†’ CaCl2 (aq) + CO2 (g) + H2O (l) In this equation, the solid calcium carbonate (CaCO3) reacts with the hydrochloric acid (HCl) t…	8bit says pretty much the same as 16bit but forgets a paragraph full of details. The 4bit loses even more details. Another example where 8bit reproduces somewhat failthfully the 16bit but 4bit does an even poor job of the same.
193	How can we reverse this process?	To reverse the process of the reaction between calcium carbonate and hydrochloric acid, you would need to convert the aqueous calcium chloride (CaCl2) back into solid calcium carbonate (CaCO3). One way to do this is by adding a base, such as sodium hydroxide (NaOH), to the aqueous calcium chloride solution. The base will react with the calcium chloride ions (CaCl2) to form solid calcium carbonate…	To reverse the process of the reaction between calcium carbonate and hydrochloric acid, you can use the following steps: 1. Add a base: Add a strong base, such as sodium hydroxide (NaOH), to the solution to neutralize the acidic properties of the hydrochloric acid. 2. Add a precipitant: Add a precipitant, such as sodium sulfate (Na2SO4), to the solution to cause the formation of a solid precipita…	To reverse the process of a neutralization reaction, you would need to add a base to the solution to neutralize the acid that was formed. In this case, you could add a strong base like sodium hydroxide (NaOH) to the solution to neutralize the hydrochloric acid (HCl) that was produced in the reaction. The reaction would look like this: CaCl2 (aq) + 2NaOH (aq) â†’ CaCO3 (s) + 2NaCl (aq) + H2O (l) I…
194	***	***	***	***
195	Please explain the differences between exothermic and endothermic reactions, and include the criteria you used to distinguish between them. Additionally, please provide a real-world example to illustrate your explanation.	Sure, I'd be happy to help! Exothermic reactions are chemical reactions that release heat energy into the surroundings. In other words, the reaction gives off heat, causing the surroundings to warm up. Endothermic reactions, on the other hand, are chemical reactions that absorb heat energy from the surroundings. In other words, the reaction takes in heat, causing the surroundings to cool down. To…	Sure, I'd be happy to help! Exothermic reactions are chemical reactions that release heat energy into the surroundings. In other words, the reaction gives off heat, causing the surroundings to warm up. Endothermic reactions, on the other hand, are chemical reactions that absorb heat energy from the surroundings. In other words, the reaction takes in heat, causing the surroundings to cool down. To…	In chemistry, a reaction's thermodynamics can be either exothermic or endothermic. Exothermic reactions are chemical reactions that release heat, whereas endothermic reactions are chemical reactions that absorb heat. Criteria for Distinguishing Between Exothermic and Endothermic Reactions: 1. Heat Evolution: Exothermic reactions release heat, whereas endothermic reactions absorb heat. 2. Change i…	Only the 16bit answer is correct. 8bit says freezing of water is endothermic but it is exothermic. The equation suggested by 4bit is the Haber's process which is exothermic! (and also not something that qualifies as a real world process as well)
196	Can a process involve both reactions? List one.	Yes, a process can involve both exothermic and endothermic reactions. One example is the production of cement. The production of cement involves the following steps: 1. Limestone (CaCO3) is heated to a high temperature in a kiln, which is an exothermic reaction. This reaction releases heat energy and produces calcium oxide (CaO) and carbon dioxide (CO2). CaCO3 â†’ CaO + CO2 + heat 2. The calcium …	Yes, a process can involve both exothermic and endothermic reactions. One example is the production of cement. The process of cement production involves the following steps: 1. Limestone (CaCO3) is heated to a high temperature in a kiln, which is an exothermic reaction that releases heat energy. 2. The limestone decomposes into calcium oxide (CaO) and carbon dioxide (CO2), which is also an exothe…	Yes, a process can involve both exothermic and endothermic reactions. One example of a process that involves both exothermic and endothermic reactions is the production of cement. The process of cement production involves the following steps: 1. Limestone (CaCO3) is heated to a high temperature in a kiln, which is an exothermic reaction that releases heat energy. 2. The limestone reacts with clay…
197	***	***	***	***
198	The city of Vega intends to build a bridge that will span the Vegona River, covering a distance of 1.8 kilometers. The proposed location falls within a seismically active area that has experienced several high-magnitude earthquakes. Given these circumstances, what would be the best approach to constructing the bridge?	Building a bridge in a seismically active area requires careful consideration of the design and construction methods to ensure the structure's safety and durability. Here are some steps that can be taken to construct a bridge that can withstand earthquakes: 1. Seismic Design Criteria: The first step is to determine the seismic design criteria for the bridge, which includes the maximum expected ea…	Building a bridge across the Vegona River in a seismically active area requires careful consideration of the design and construction methods to ensure the structure's safety and durability. Here are some recommendations for the best approach: 1. Seismic Design: The bridge's design should be based on a thorough analysis of the potential seismic loads and their effects on the structure. This may in…	Building a bridge in a seismically active area requires a careful and comprehensive approach to ensure the safety and durability of the structure. Here are some steps that can be taken to construct a bridge that can withstand earthquakes: 1. Seismic risk assessment: Conduct a thorough seismic risk assessment to determine the potential earthquake forces that the bridge may be subjected to. This wi…
199	What are the key disadvantages or flaws of your solution? Please perform calculations and use numbers to illustrate them.	While the solution I provided earlier takes into account the seismic design criteria and site-specific seismic hazard assessment, there are some potential disadvantages and flaws that should be considered: 1. Cost: The construction of a bridge that can withstand earthquakes can be expensive. The use of deep foundations, specialized materials, and advanced construction methods can increase the con…	While the proposed solution takes into account the seismic design and construction considerations for building a bridge across the Vegona River, there are some potential disadvantages and flaws to consider: 1. Cost: The use of advanced materials, specialized engineering, and construction techniques may increase the project's cost. The cost of materials, labor, and equipment for a 1.8-kilometer br…	While the proposed solution has several advantages, there are also some disadvantages and flaws that should be considered: 1. Higher Cost: The proposed solution uses more expensive materials and techniques compared to traditional bridge construction methods. The cost of using fiber-reinforced polymer (FRP) composites, for example, is higher than traditional materials like steel and concrete. Acco…
200	***	***	***	***
201	You have been tasked with designing a solar-powered water heating system for a residential building. Describe the key components and considerations you would include in your design. Design a five-step workflow.	Sure! Here's a five-step workflow for designing a solar-powered water heating system for a residential building: Step 1: Determine the Requirements and Site Assessment * Determine the daily hot water requirements for the building based on occupancy, usage patterns, and climate. * Assess the solar resource at the site, including solar radiation, temperature, and shading. * Evaluate the building's …	Sure! Here's a five-step workflow for designing a solar-powered water heating system for a residential building: Step 1: Determine the Water Heating Load The first step is to determine the water heating load for the building. This involves calculating the daily hot water usage in gallons or liters. Factors to consider include the number of occupants, water usage patterns, and the temperature of t…	Sure! Here's a five-step workflow for designing a solar-powered water heating system for a residential building: Step 1: Determine the Water Heating Load The first step is to determine the water heating load of the building. This involves calculating the amount of hot water required for various uses such as showers, baths, washing machines, and dishwashers. The water heating load can be calculate…
202	If the system is intended for a building with a capacity of 100 individuals, what would be the estimated budget for implementing this system?	The estimated budget for implementing a solar-powered water heating system for a building with a capacity of 100 individuals would depend on several factors, including the type and size of the solar collectors, the heat transfer and storage system, the plumbing and HVAC integration, and the location of the building. However, here are some rough estimates for the various components of the system: …	The estimated budget for implementing a solar-powered water heating system for a building with a capacity of 100 individuals would depend on several factors, including the type and quality of components, the location and climate of the building, and the desired level of energy efficiency. However, here are some rough estimates for the various components of a solar-powered water heating system: * …	The estimated budget for implementing a solar-powered water heating system for a building with a capacity of 100 individuals would depend on several factors, including the type and size of the solar collectors, the storage tank capacity, and the plumbing and installation costs. However, here are some rough estimates for the various components of the system: 1. Solar collectors: The cost of solar …
203	***	***	***	***
204	Please describe the concept of machine learning. Could you elaborate on the differences between supervised, unsupervised, and reinforcement learning? Provide real-world examples of each.	Sure, I'd be happy to explain the concept of machine learning and the differences between supervised, unsupervised, and reinforcement learning. Machine learning is a subfield of artificial intelligence that involves training algorithms on data to enable them to make predictions or decisions without being explicitly programmed. The goal of machine learning is to enable machines to learn from data …	Sure, I'd be happy to explain the concept of machine learning and the differences between supervised, unsupervised, and reinforcement learning. Machine learning is a subfield of artificial intelligence that involves training algorithms to learn from data and make predictions or decisions without being explicitly programmed. The goal of machine learning is to enable machines to learn from experien…	Machine learning is a subfield of artificial intelligence that involves the use of algorithms and statistical models to enable machines to learn from data, make decisions, and improve their performance on a specific task over time. There are three main types of machine learning: supervised learning, unsupervised learning, and reinforcement learning. 1. Supervised Learning: Supervised learning inv…
205	In your last example of reinforcement learning, can we use supervised learning to solve it?	Yes, it's possible to use supervised learning to solve a problem that is typically tackled with reinforcement learning. In fact, there are many cases where reinforcement learning and supervised learning are used together. In the context of the self-driving car example, you could use supervised learning to train a model to predict the optimal action (e.g., steering angle, acceleration, braking) gi…	Yes, it's possible to use supervised learning to solve a problem that was previously solved using reinforcement learning. In fact, there are many cases where reinforcement learning and supervised learning can be used together to achieve better results. In the context of game playing, for example, you can use supervised learning to train a model to predict the next move that a human player would m…	Yes, it's possible to use supervised learning to solve a problem that involves learning to make a series of decisions in an environment to maximize a reward signal. In fact, many reinforcement learning problems can be solved using supervised learning techniques, especially in situations where the environment is fully observable and the reward function is well-defined. In supervised learning, the …
206	***	***	***	***
207	How have the Alps and Rhine River influenced settlement and agriculture in Western Europe? List three impacts.	The Alps and Rhine River have played a significant role in shaping the settlement and agriculture patterns in Western Europe. Here are three impacts: 1. Mountainous Barrier: The Alps have acted as a natural barrier to the movement of people and goods, influencing the settlement patterns in Western Europe. The rugged terrain and harsh climate have made it difficult for people to settle and cultiva…	The Alps and Rhine River have had significant impacts on settlement and agriculture in Western Europe. Here are three examples: 1. The Alps have created natural barriers that have influenced the movement of people and goods throughout history. The mountain range has acted as a barrier to the spread of ideas, cultures, and technologies, which has resulted in the development of unique cultures and …	The Alps and Rhine River have had significant impacts on settlement and agriculture in Western Europe. Here are three examples: 1. The Alps have created a barrier to settlement and trade, leading to the development of distinct cultural and linguistic regions on either side of the mountain range. For example, the Alps have historically separated the German-speaking regions of Central Europe from t…
208	How could you design a concrete but simple experiment to validate the first impact?	To validate the first impact of the Alps as a natural barrier to the movement of people and goods, you could design an experiment that compares the settlement patterns and trade routes in areas with and without significant mountainous terrain. Here's a simple experiment to demonstrate this: 1. Choose two regions in Western Europe: one with significant mountainous terrain (e.g., the Swiss Alps) an…	To validate the first impact of the Alps on the development of unique cultures and traditions, you could design an experiment that compares the cultural practices and traditions of communities living on opposite sides of the Alps. Here's a simple experiment that could help validate this impact: 1. Select two communities, one located on the northern side of the Alps and the other on the southern s…	To validate the first impact of the Alps and Rhine River on the diversity of languages and cultures in Western Europe, we can design a simple experiment that compares the linguistic and cultural differences between regions on either side of the Alps and Rhine River. Here's a possible experiment: 1. Select three regions on either side of the Alps and Rhine River: one region in France, one region i…	We need to have 2 scenarios - one with mountains and other without and compare between them. The 8bit only looks at places with mountains which is insuffcient. The 4bit's answer looks robotic and not as fleshed out as the 16bit's.
209	***	***	***	***
210	Provide insights into the correlation between economic indicators such as GDP, inflation, and unemployment rates. Explain how fiscal and monetary policies affect those indicators.	Certainly! Here's an explanation of the correlation between economic indicators such as GDP, inflation, and unemployment rates, as well as how fiscal and monetary policies affect those indicators: GDP (Gross Domestic Product) is a measure of a country's economic output, representing the total value of goods and services produced within its borders. Inflation, on the other hand, refers to the rate…	Certainly! Here's an explanation of the correlation between economic indicators such as GDP, inflation, and unemployment rates, as well as how fiscal and monetary policies affect those indicators: Gross Domestic Product (GDP): GDP is a measure of a country's economic output, representing the total value of goods and services produced within its borders. It's a widely used indicator of a country's…	There is a complex relationship between economic indicators such as GDP, inflation, and unemployment rates. Here are some insights into their correlation and how fiscal and monetary policies affect them: 1. GDP and Inflation: GDP (Gross Domestic Product) is a measure of a country's economic output, while inflation is a sustained increase in the general price level of goods and services in an econ…
211	Now, explain them again like I'm five.	Sure, I'd be happy to explain them in a way that a five-year-old could understand! GDP is like a big piggy bank where we keep all the money that we make from selling things. When we make more money, the piggy bank gets bigger. Inflation is like when the prices of things go up. Imagine you really want a toy that costs $10, but one day it starts costing $15. That's like inflation! Unemployment is l…	Sure, I'd be happy to explain them in a way that a five-year-old could understand! GDP is like a big piggy bank where we keep all the money that we make from selling things. When the piggy bank gets bigger, it means we're making more money and the economy is growing. Inflation is like when the prices of toys go up. Imagine you really want a new toy that costs $10, but one day it starts costing $1…	Okay, imagine you have a toy box full of different toys like cars, dolls, and blocks. Each toy represents a different thing in the economy, like how much money people are spending, how many people have jobs, or how much things cost. GDP is like a big toy that shows how much all the other toys are worth. It's like a big number that tells us how healthy the economy is. Inflation is like a toy that …	4bit answers are a bit weird (inflation is toy that makes other toys expensive) . It slso says the fiscal and monetary policies are same - some govt superpower. 16bit answer is more fluent than 8bit
212	***	***	***	***
213	How do the stages of life shape our understanding of time and mortality?	The stages of life can significantly shape our understanding of time and mortality. Here's a breakdown of how each stage might influence our perception: 1. Childhood (0-12 years): During childhood, time seems to stretch on forever. Children live in the present moment and don't fully comprehend the concept of mortality. They may have a basic understanding that people can die, but it's not a pressi…	The stages of life can significantly shape our understanding of time and mortality. Here's a breakdown of how each stage might influence our perception: 1. Childhood (0-12 years): During childhood, time seems to stretch on forever. Children live in the present moment and don't fully comprehend the concept of mortality. They may have a basic understanding that people can die, but it's not a pressi…	The various stages of life can have a profound impact on our understanding of time and mortality. As we progress through the different phases of life, our perception of time and our relationship with mortality can shift and evolve. Here are some ways in which the stages of life can shape our understanding of time and mortality: 1. Childhood: During childhood, time seems to stretch out endlessly, …
214	Write an allegorical poem that illustrates the above.	Sure, here's an allegorical poem that reflects the stages of life and their influence on our understanding of time and mortality: The River of Life In the dawn of youth, we embark On the river of life, a journey dark With waters swift and deep, we glide Through days of wonder, nights of pride The banks are lined with green and bright As we play, laugh, and dance with delight The sun shines warm, …	Sure, here's an allegorical poem that explores the stages of life and their influence on our understanding of time and mortality: The River of Life In the dawn of youth, we embark On the river of life, a journey dark With waters swift and deep, we glide Through days of wonder, nights of pride The banks are lined with green and bright As we play and laugh, our spirits light The sun shines warm, th…	The River of Time In the depths of a valley, a river flowed, With waters that shimmered like gold. It wound its way through the land, A force both gentle and bold. Its source was a spring, pure and clear, Where the waters of life first appeared. And as it flowed, it grew in might, A force that could carve through the night. It flowed through the seasons, Through winter's chill and summer's heat. …
215	***	***	***	***
216	Discuss antitrust laws and their impact on market competition. Compare the antitrust laws in US and China along with some case studies.	Antitrust laws, also known as competition laws, aim to promote market competition by regulating anti-competitive business practices. These laws are designed to protect consumers and small businesses from unfair practices that could harm competition. In this response, I'll discuss the impact of antitrust laws on market competition, compare the antitrust laws in the US and China, and provide some c…	Antitrust laws, also known as competition laws, are regulations designed to promote competition and prevent monopolies in the marketplace. These laws aim to protect consumers and small businesses by ensuring that there is fair competition among companies. In this response, I will discuss the impact of antitrust laws on market competition, and compare the antitrust laws in the United States and Ch…	Antitrust laws, also known as competition laws, are regulations designed to promote competition and prevent monopolies in the marketplace. These laws are aimed at ensuring that businesses compete fairly and that consumers have access to a variety of choices and fair prices. In this essay, we will discuss the impact of antitrust laws on market competition, compare the antitrust laws in the United …
217	Pick one case study and explain it in detail.	Sure, let me explain the case study of United States v. Microsoft (2001) in detail. Background: Microsoft was founded in 1975 by Bill Gates and Paul Allen. The company's initial focus was on developing software for personal computers. In the 1980s, Microsoft released its Windows operating system, which quickly became the dominant operating system in the market. By the 1990s, Microsoft had expande…	Sure, let me explain the case study of Qualcomm Inc. v. NDRC (2015) in detail. Background: Qualcomm Inc. is a leading provider of wireless communication chips and technologies. In 2015, China's National Development and Reform Commission (NDRC) launched an investigation into Qualcomm's business practices, alleging that the company had abused its dominant position in the market for wireless communi…	Sure, let's take the case study of Microsoft's antitrust lawsuit in the United States as an example. In the 1990s, Microsoft faced antitrust lawsuits in the United States, alleging that the company had used its dominance in the market to stifle competition. The case was filed by the Department of Justice (DOJ) and several state attorneys general, and it was settled in 2001. The main allegation ag…
218	***	***	***	***
219	Create a lesson plan that integrates drama, mime or theater techniques into a history class. Duration: 3 class periods (each lasts for 45 minutes) for 3 days Topic: Opium Wars between China and Britain Grade level: 9-10	Sure, here's a lesson plan that integrates drama, mime, or theater techniques into a history class on the Opium Wars between China and Britain for 9-10th graders. **Lesson Plan:** **Day 1: Introduction and Mime Activity** 1. Introduction (5 minutes): * Introduce the topic of the Opium Wars and its significance in world history. * Explain that students will be exploring this topic through drama, m…	Sure, here's a lesson plan that integrates drama, mime, or theater techniques into a history class on the Opium Wars between China and Britain for 9-10th graders. **Lesson Plan:** **Day 1: Introduction and Dramatization** 1. Introduction (5 minutes): * Introduce the topic of the Opium Wars and its significance in world history. * Explain that students will be using drama, mime, and theater techni…	Sure, here's a lesson plan that integrates drama, mime, or theater techniques into a history class on the Opium Wars between China and Britain for 9-10th graders: **Lesson Plan: Opium Wars through Drama** **Grade Level:** 9-10 **Subject Area:** History **Time Needed:** 3 class periods (45 minutes each) for 3 days **Objective:** Students will use drama, mime, or theater techniques to understand an…
220	Provide more details for Day 1 and include three homework questions.	Sure, here's an updated version of Day 1 with more details and three homework questions: **Day 1: Introduction and Mime Activity** 1. Introduction (5 minutes): * Introduce the topic of the Opium Wars and its significance in world history. * Explain that students will be exploring this topic through drama, mime, and theater techniques. * Show a short video or image presentation to provide a brief …	Sure, here's an updated version of Day 1 with more details and three homework questions: **Day 1: Introduction and Dramatization** 1. Introduction (5 minutes): * Introduce the topic of the Opium Wars and its significance in world history. * Explain that students will be using drama, mime, and theater techniques to understand and retell the story of the Opium Wars. 2. Warm-up Activity (10 minutes)…	Sure, here's an updated version of the lesson plan with more details for Day 1 and three homework questions: **Lesson Plan: Opium Wars through Drama** **Grade Level:** 9-10 **Subject Area:** History **Time Needed:** 3 class periods (45 minutes each) for 3 days **Objective:** Students will use drama, mime, or theater techniques to understand and reenact the Opium Wars between China and Britain, an…
221	***	***	***	***
222	Share ideas for adapting art masterpieces into interactive experiences for children. List 5 specific artworks and associated ideas.	Sure! Here are five art masterpieces and interactive experience ideas for children: 1. "Starry Night" by Vincent van Gogh: Create a "Starry Night"-themed room with a dark ceiling and twinkling lights. Provide canvas boards and painting supplies for the children to create their own starry night landscapes. Offer a "Van Gogh's Ear" station where they can practice their listening skills by listening…	Sure! Here are 5 art masterpieces and interactive experience ideas for children: 1. "Starry Night" by Vincent van Gogh: Create a replica of the painting on a large canvas or wall. Provide materials for the children to create their own starry night sky using paint, glitter, or stickers. They can also add their own personal touches, such as a shooting star or a moon, to make the artwork their own. …	Sure! Here are five art masterpieces and interactive experience ideas for children: 1. "Starry Night" by Vincent van Gogh Idea: Create a virtual reality experience that allows children to explore the painting's dreamlike landscape. Children can put on VR headsets and find themselves transported to the painting's swirling night sky, where they can explore the stars, trees, and village below. They …
223	Write a concrete plan for your second example. Include budget estimates.	Sure, here's a concrete plan for the second example, "The Mona Lisa" by Leonardo da Vinci: Title: "Mona Lisa's Smile" Interactive Art Experience Objective: To create an interactive art experience that allows children to engage with "The Mona Lisa" painting and learn about its history, mysteries, and the artist's techniques. Target Audience: Children aged 6-12 and their families. Location: A local…	Sure, here's a concrete plan for the second example, "The Mona Lisa" interactive experience: Title: "The Mona Lisa Smile" Interactive Photo Booth Objective: To create an engaging and educational experience for children, inspired by Leonardo da Vinci's "Mona Lisa," that fosters creativity, self-expression, and an appreciation for art history. Materials: * Backdrop: A large, printed replica of the …	Sure, here's a concrete plan for the second example, "The Mona Lisa" by Leonardo da Vinci: Title: "Unlocking the Secrets of the Mona Lisa" Objective: To create an engaging and interactive experience for children that teaches them about the artistic techniques, historical context, and cultural significance of "The Mona Lisa" painting by Leonardo da Vinci. Target Audience: Children aged 8-12, their…
224	***	***	***	***
225	Explain what's base rate fallacy and list five specific examples of how politicians use it for campaigns.	Base rate fallacy refers to the tendency to judge the likelihood of an event based on the frequency of a related event, rather than considering the actual probability of the event itself. In other words, it's the error of overestimating the importance of a piece of information because it is more easily remembered or more salient, rather than considering the full context. Here are five examples of…	Base rate fallacy refers to the tendency to ignore the base rate of a phenomenon and focus on more salient or vivid information. In the context of political campaigns, politicians may use this fallacy to manipulate public opinion by highlighting exceptional cases or anecdotes rather than providing a balanced view of the facts. Here are five examples of how politicians might use base rate fallacy …	The base rate fallacy is a cognitive bias that occurs when people erroneously judge the likelihood of a certain event based on the frequency of a related event, rather than considering the actual probability of the event. In other words, it's the tendency to judge the likelihood of an event based on how easily examples come to mind, rather than on the actual statistics. Politicians often use the …
226	Provide a detailed plan for an election campaign using the first example.	Sure, here's a detailed plan for an election campaign using the first example of fear-mongering: Campaign Theme: "Protecting Our Communities from Harm" Objective: To create a sense of urgency and fear among voters, and position the candidate as the only one who can protect them from perceived dangers. Target Audience: Swing voters in key battleground states, particularly those with a history of v…	Sure, here's a detailed plan for an election campaign using the first example of fearmongering: Campaign Theme: "Protecting Our Communities" Objective: To create a sense of urgency and fear among voters, emphasizing the need for a strong leader who will protect them from crime and terrorism. Target Audience: Swing voters in suburban and rural areas who are concerned about safety and security. Mes…	Sure, here's a detailed plan for an election campaign using the first example of the base rate fallacy: Campaign Goal: The goal of the campaign is to elect a candidate who supports stricter gun control laws. Target Audience: The target audience for this campaign is voters who are concerned about gun violence and support stricter gun control laws. Message: The message of the campaign will focus on…
227	***	***	***	***
228	Describe five key principles in evaluating an argument in analytical writing.	Certainly! Here are five key principles in evaluating an argument in analytical writing: 1. Clarity: The argument should be presented clearly and concisely, with no ambiguity or confusion. The writer should use specific evidence and examples to support their claims, and avoid vague generalizations or unsubstantiated assertions. 2. Validity: The argument should be logically valid, meaning that the…	Certainly! Here are five key principles to evaluate an argument in analytical writing: 1. Clarity: The argument should be presented clearly and concisely, with no ambiguity or confusion. The writer should use specific evidence and examples to support their claims, and avoid vague generalizations or unsubstantiated assertions. 2. Validity: The argument should be logically sound and based on valid …	Sure! Here are five key principles to keep in mind when evaluating an argument in analytical writing: 1. Identify the claim: The first step in evaluating an argument is to identify the claim being made. What is the main point that the author is trying to make? What is their thesis statement? Is it clearly stated or implied? Understanding the claim is essential to evaluating the argument's validit…
229	With the listed principles, write a response in which you discuss what specific evidence is needed to evaluate the argument and explain how the evidence would weaken or strengthen the argument. === The following is a memorandum from the advertising head of Zorblatt Animal Outlets, a chain operating thirty animal outlets globally. "Half a decade ago, our rival Aquatic Pavilion started publicizing …	To evaluate the argument presented in the memorandum, we need specific evidence in several areas. Firstly, we need data on the sales growth of Aquatic Pavilion and Zorblatt Animal Outlets to assess the validity of the claim that Aquatic Pavilion's advertising in Rare Pets Digest has led to increased sales. We should also compare the sales growth rates of both companies before and after Aquatic Pa…	To evaluate the argument presented in the memorandum, we need specific evidence related to the advertising strategy and its potential impact on sales. Here are some examples of evidence that could weaken or strengthen the argument: 1. Sales data: The memorandum mentions a consistent drop in sales for Zorblatt's two outlets in Harbor Town, but it would be helpful to see specific sales data for all…	The argument presented in the memorandum is that Zorblatt Animal Outlets should start featuring their own advertisements in Rare Pets Digest and other popular animal publications in order to reverse the recent trend of decreasing sales and return to profitability. To evaluate this argument, specific evidence is needed in several areas: 1. Advertising effectiveness: Evidence is needed to support t…
230	***	***	***	***
231	Which methods did Socrates employ to challenge the prevailing thoughts of his time?	Socrates employed several methods to challenge the prevailing thoughts of his time, including: 1. Questioning: Socrates was known for his ability to ask insightful and provocative questions that challenged the beliefs and assumptions of his interlocutors. He believed that questioning was a powerful tool for uncovering truth and exposing false beliefs. 2. Dialogue: Socrates often engaged in dialog…	Socrates employed several methods to challenge the prevailing thoughts of his time, including: 1. Questioning: Socrates was known for his ability to ask insightful and provocative questions that challenged the beliefs and assumptions of his interlocutors. He believed that questioning was a powerful tool for uncovering truth and exposing false beliefs. 2. Dialogue: Socrates often engaged in dialog…	Socrates employed several methods to challenge the prevailing thoughts of his time, including: 1. Questioning: Socrates was known for his ability to ask probing questions that challenged the beliefs and assumptions of those he encountered. He would often ask a series of questions that led his interlocutors to question their own beliefs and consider alternative perspectives. 2. Dialogue: Socrates …
232	Let's bring Socrates to modern world. Generate a conversation between Socrates and Bill Gates to debate on generative AI for education.	Socrates: Greetings, Bill Gates. I have been observing your efforts to integrate generative AI into education. I must say, I am intrigued by the potential benefits, but I also have some concerns. Bill Gates: Hello, Socrates. I'm glad to hear that you're interested in the potential of AI for education. I believe it can revolutionize the way we learn and make education more accessible and effective…	Socrates: Greetings, Bill Gates. I've been following your work on generative AI for education, and I must say, I have some reservations. Bill Gates: Hello, Socrates. I'm glad to hear your thoughts. Generative AI has the potential to revolutionize education, providing personalized learning experiences for students. Socrates: I understand your enthusiasm, but I fear that relying too heavily on AI f…	Socrates: Greetings, Bill Gates. I must say, I am impressed by your efforts to revolutionize the field of education through technology. But tell me, have you considered the potential consequences of relying too heavily on generative AI in the classroom? Bill Gates: Socrates, it's a pleasure to meet you. I believe that generative AI has the potential to greatly enhance the learning experience for …
233	***	***	***	***
234	What are some business etiquette norms when doing business in Japan?	When doing business in Japan, it's important to be mindful of cultural norms and etiquette. Here are some key business etiquette norms to keep in mind: 1. Bowing: Bowing is a common greeting in Japan, and it's important to know the proper etiquette. A bow is a sign of respect, and the depth and duration of the bow depends on the situation. A slight bow of the head is appropriate for casual encoun…	When doing business in Japan, it's important to be mindful of cultural norms and etiquette. Here are some key norms to keep in mind: 1. Bowing: Bowing is a common greeting in Japan, and it's important to know the proper etiquette. A bow is a sign of respect, and the depth and duration of the bow depends on the situation. A slight bow of the head is appropriate for casual encounters, while a deepe…	When doing business in Japan, it's important to be mindful of cultural norms and etiquette to build trust and establish strong relationships. Here are some key business etiquette norms to keep in mind: 1. Bowing: Bowing is a common greeting in Japan, and it's important to know the proper etiquette. A bow is a sign of respect, and the depth and duration of the bow depends on the situation. A sligh…
235	Create a video script for training new employees of a car wash business in Japan. Highlight the above etiquette norms.	Sure, here's a script for a training video on business etiquette for new employees of a car wash business in Japan: [Intro music plays and the host, a friendly Japanese woman, appears on screen with a warm smile] Host: Konnichiwa! Welcome to our car wash business in Japan. We're excited to have you join our team, and we want to make sure you feel confident and prepared for your new role. In this …	Sure, here's a script for a training video on Japanese etiquette norms for new employees of a car wash business in Japan: [Intro music plays and the host, a friendly Japanese woman, appears on screen with a warm smile] Host: Konnichiwa! Welcome to our car wash business in Japan. We're thrilled to have you on board as a new employee. In this video, we'll be discussing some important etiquette norm…	Title: "Welcome to Our Car Wash Business in Japan: Etiquette Norms for New Employees" [Intro music plays and the host, a friendly Japanese woman, appears on screen with a warm smile] Host: "Konnichiwa! Welcome to our car wash business in Japan. We're thrilled to have you join our team and be a part of our unique culture. In this video, we'll be discussing some important etiquette norms that will …
236	***	***	***	***
237	Suggest five award-winning documentary films with brief background descriptions for aspiring filmmakers to study.	Certainly! Here are five award-winning documentary films with brief background descriptions for aspiring filmmakers to study: 1. "The Cove" (2009) - This documentary exposes the shocking truth behind dolphin hunting in Japan. The film follows a group of activists as they infiltrate a protected cove and document the brutal slaughter of dolphins. "The Cove" won several awards, including the Academy…	Certainly! Here are five award-winning documentary films with brief background descriptions for aspiring filmmakers to study: 1. "The Cove" (2009) - This documentary exposes the shocking truth behind dolphin hunting in Japan. The film follows a group of activists as they infiltrate a protected cove and document the brutal slaughter of dolphins. "The Cove" won several awards, including the Academy…	Sure, here are five award-winning documentary films that aspiring filmmakers can study to learn about storytelling, cinematography, and social impact: 1. "The Cove" (2009) - This documentary film exposes the brutal practice of dolphin hunting in a small Japanese town called Taiji. The film follows a group of activists as they infiltrate the hunt and document the horrific slaughter of dolphins. "T…
238	With the spirit in the first film, craft a succinct and persuasive pitch for a film about overcoming adversity.	Here's a succinct and persuasive pitch for a film about overcoming adversity: Title: "Unbreakable" Logline: When a young woman's life is shattered by a tragic accident, she must find the strength within herself to overcome her struggles and emerge stronger than ever before. Synopsis: "Unbreakable" follows the journey of Sarah, a talented artist who is left with a physical disability after a car a…	Here's a succinct and persuasive pitch for a film about overcoming adversity: Title: "Unbreakable" Logline: When a young woman's life is shattered by a tragic accident, she must summon the strength to overcome her struggles and find a new sense of purpose. Synopsis: "Unbreakable" follows the journey of Sarah, a talented artist who is left with a devastating spinal cord injury after a car crash. A…	Sure, here's a pitch for a film about overcoming adversity: Title: "Unbreakable" Logline: When a young woman's life is turned upside down by a sudden tragedy, she must find the strength within herself to overcome her struggles and emerge stronger than ever. Synopsis: "Unbreakable" follows the journey of Sarah, a successful businesswoman in her late 20s who has always had a perfect life. She has a…
239	***	***	***	***
